# Supplementary material
Source: PubMed Central journal article supplement (PMC2929168)

Figure S13.  $^1\text{H}$  NMR spectrum of 1-allyl-3-methylimidazolidin-2-one (**3**).

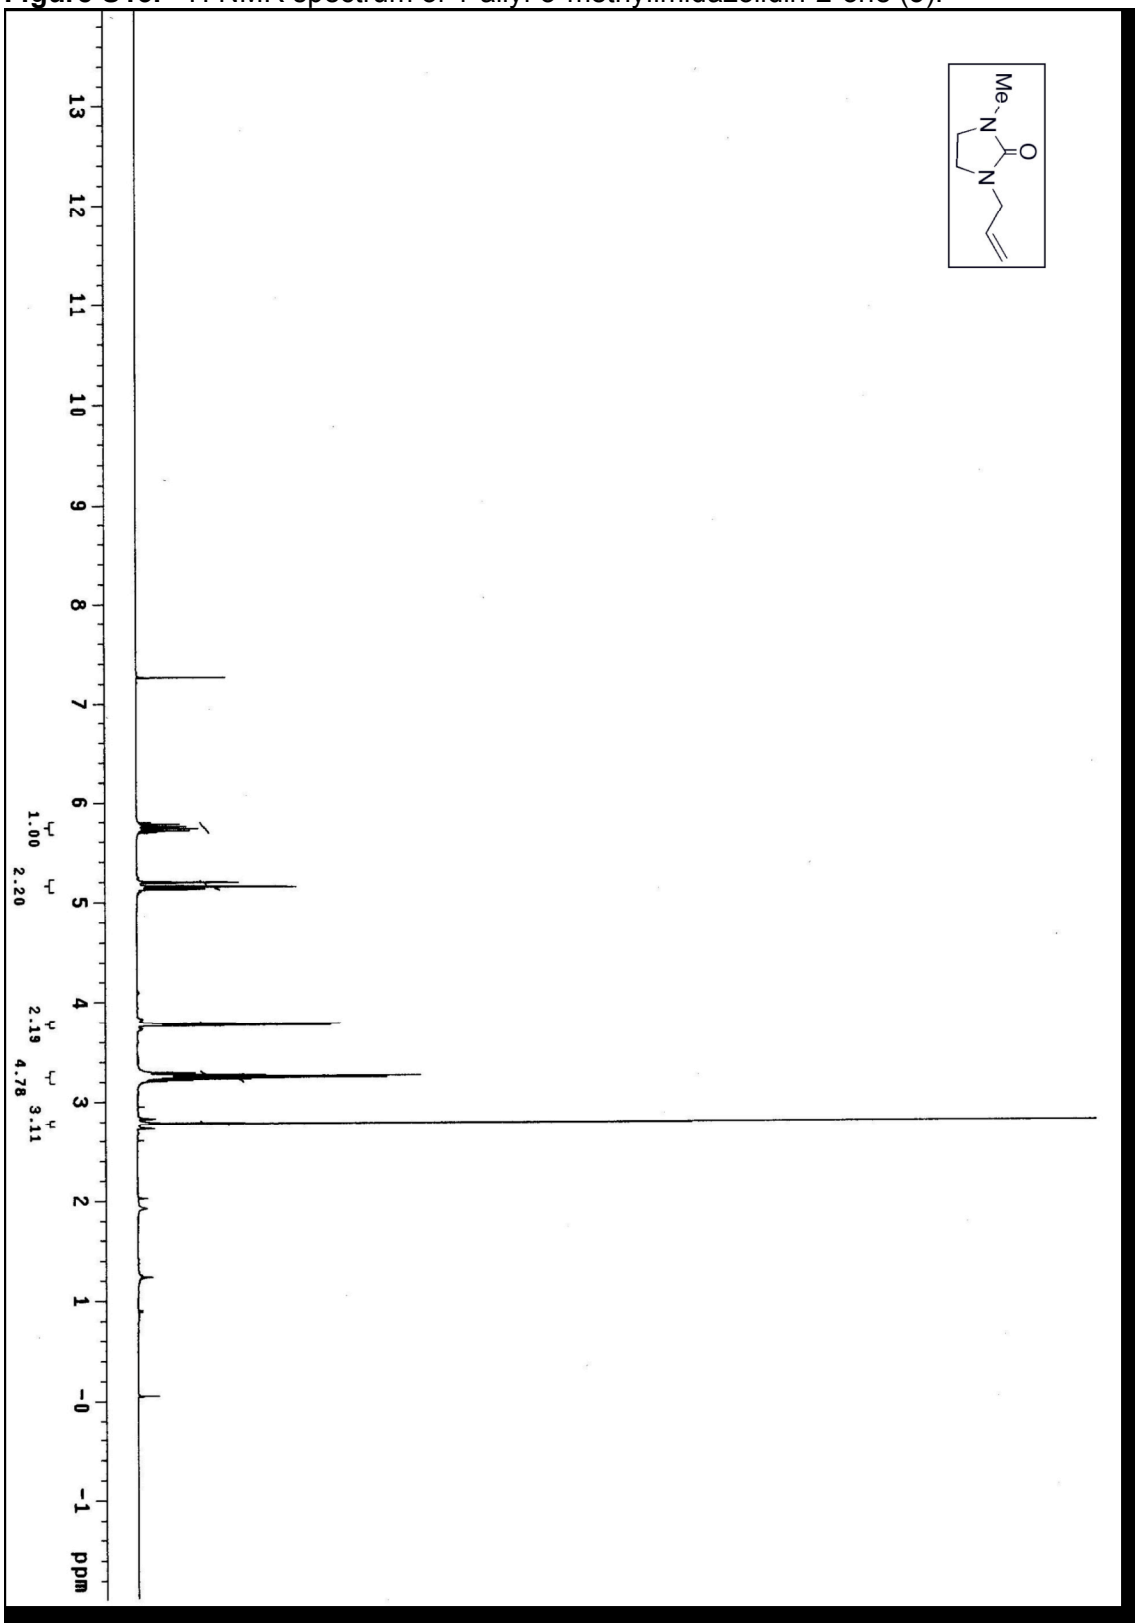

Figure S14.  $^{13}\text{C}\{^1\text{H}\}$  NMR spectrum of 1-allyl-3-methylimidazolidin-2-one (**3**).

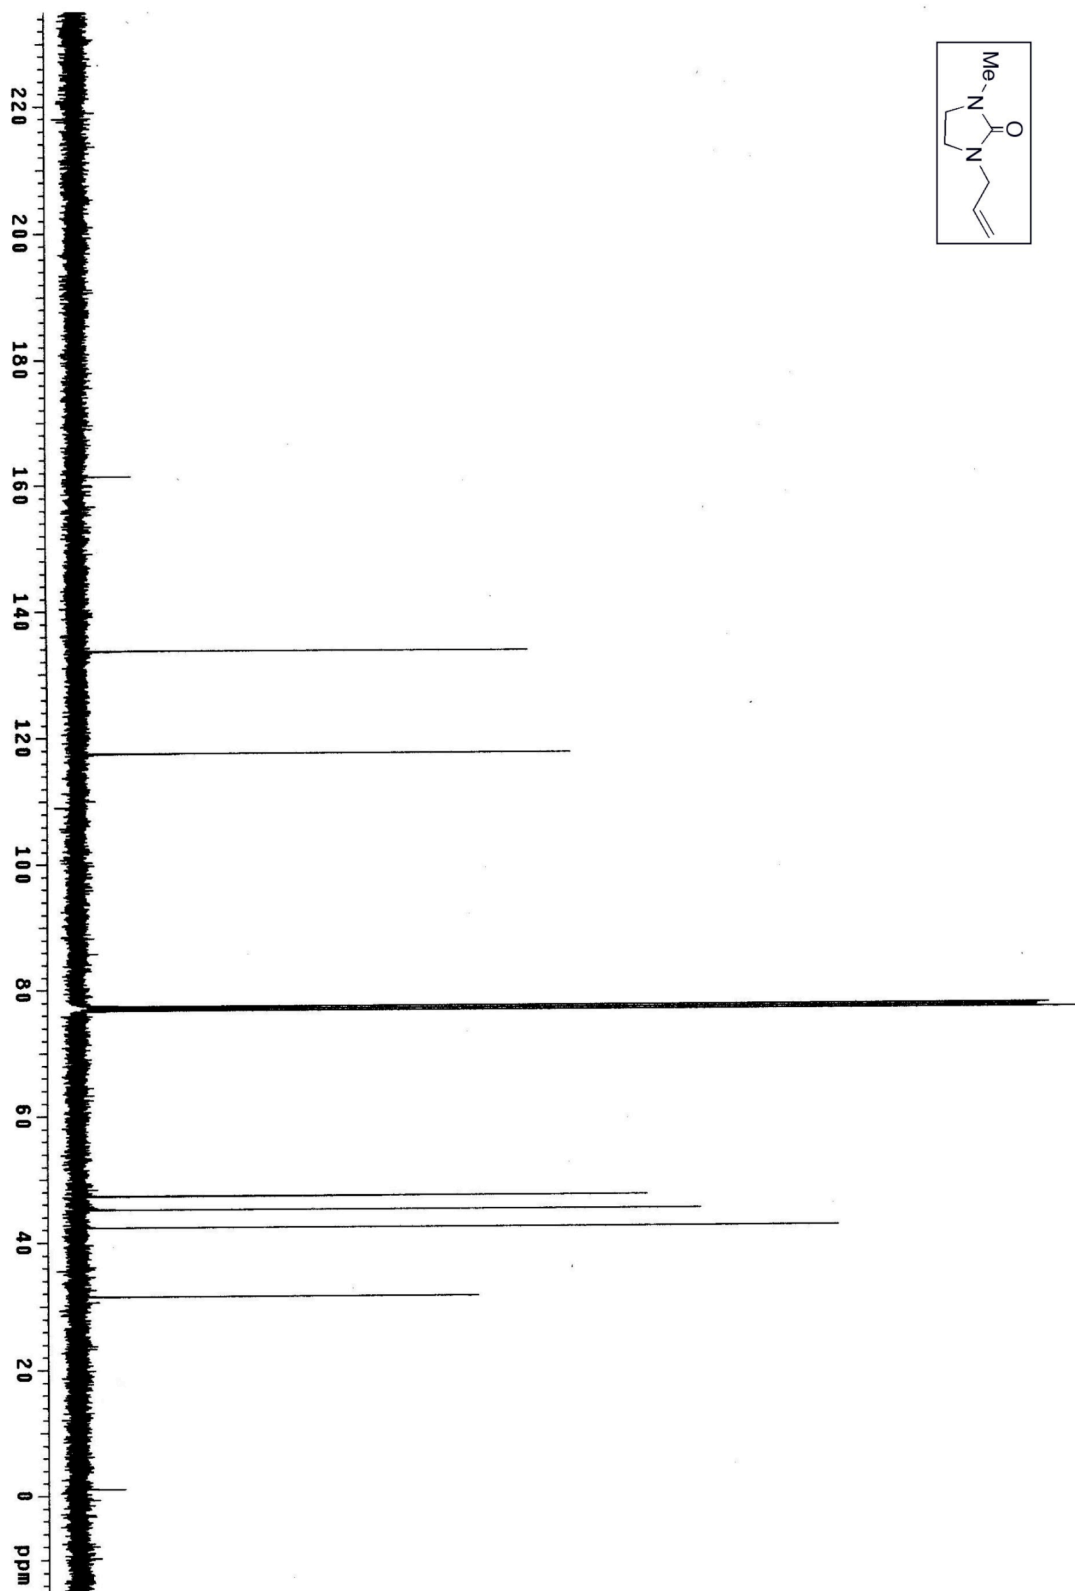

Figure S15.  $^1\text{H}$  NMR spectrum of 1,3-diallylimidazolidin-2-one.

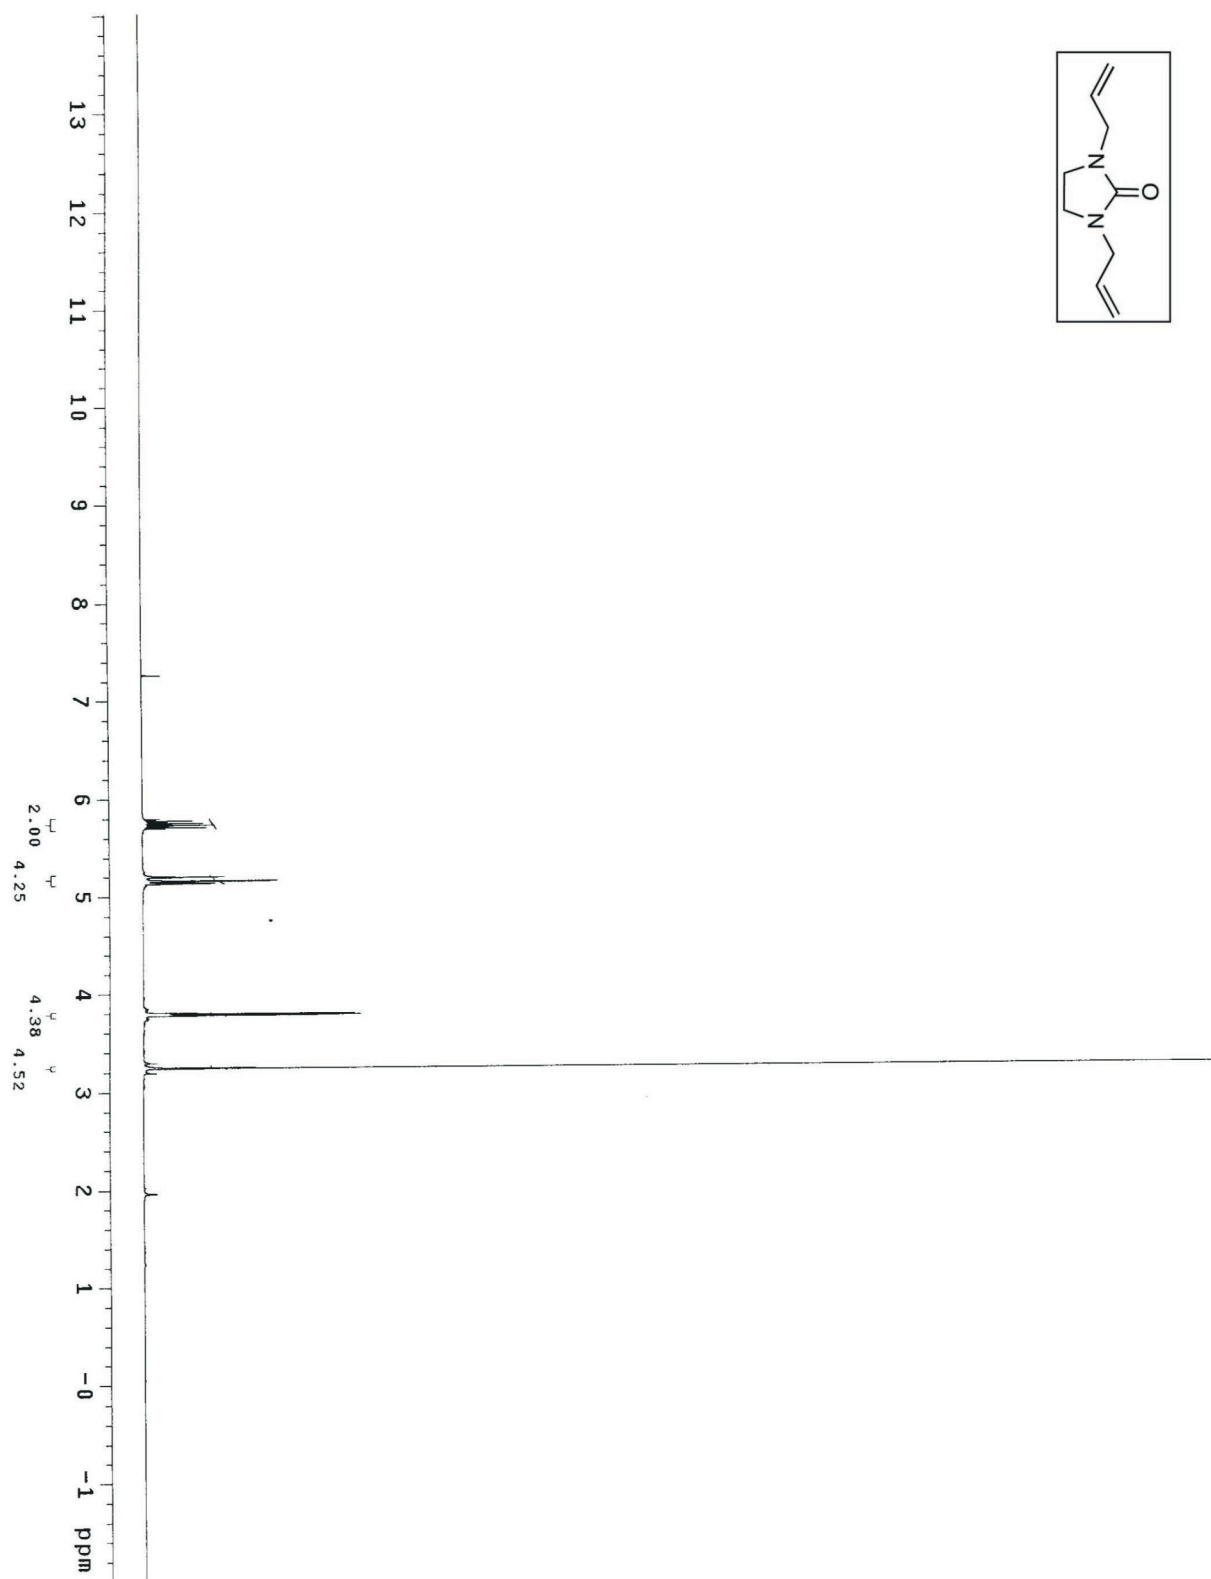

Figure S16.  $^{13}\text{C}\{^1\text{H}\}$  NMR spectrum of 1,3-diallylimidazolidin-2-one.

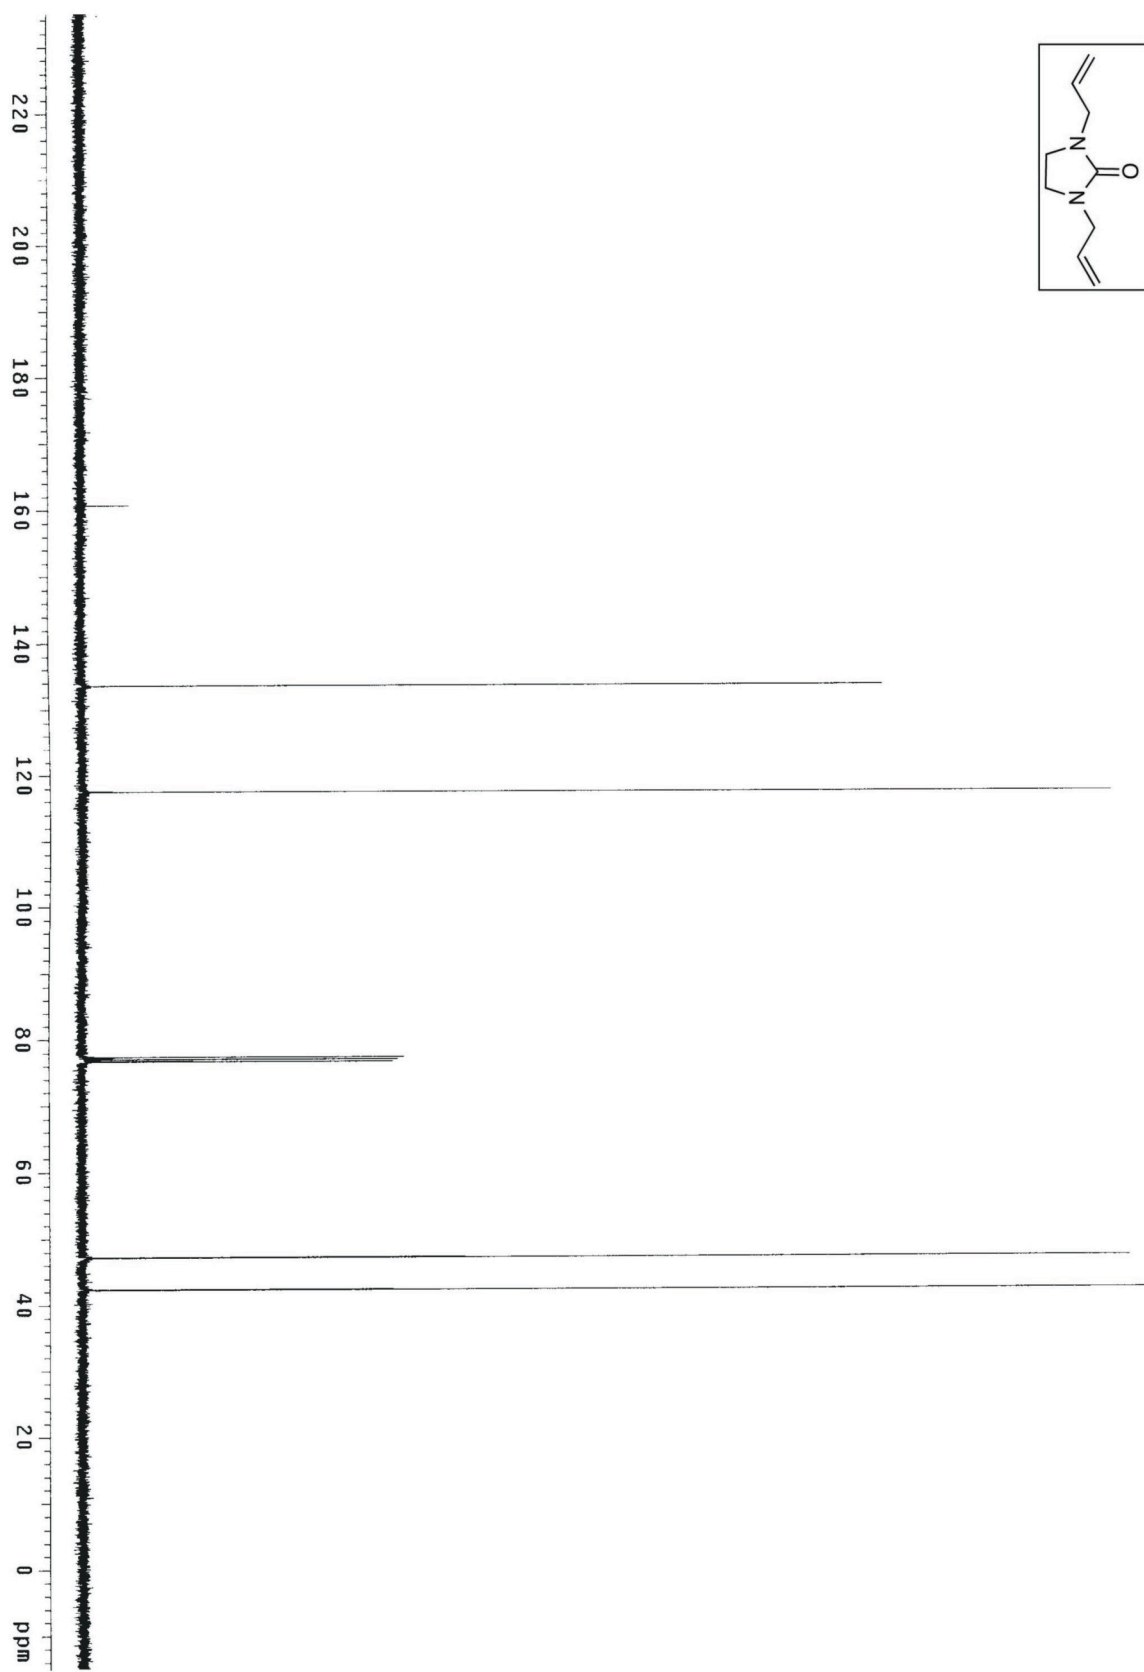

**Figure S17.**  $^1\text{H}$  NMR spectrum of 1-(3,3-dideuterio-2-propenyl)-3-methyl-imidazolidin-2-one (**3- $\gamma,\gamma$ - $d_2$** ).

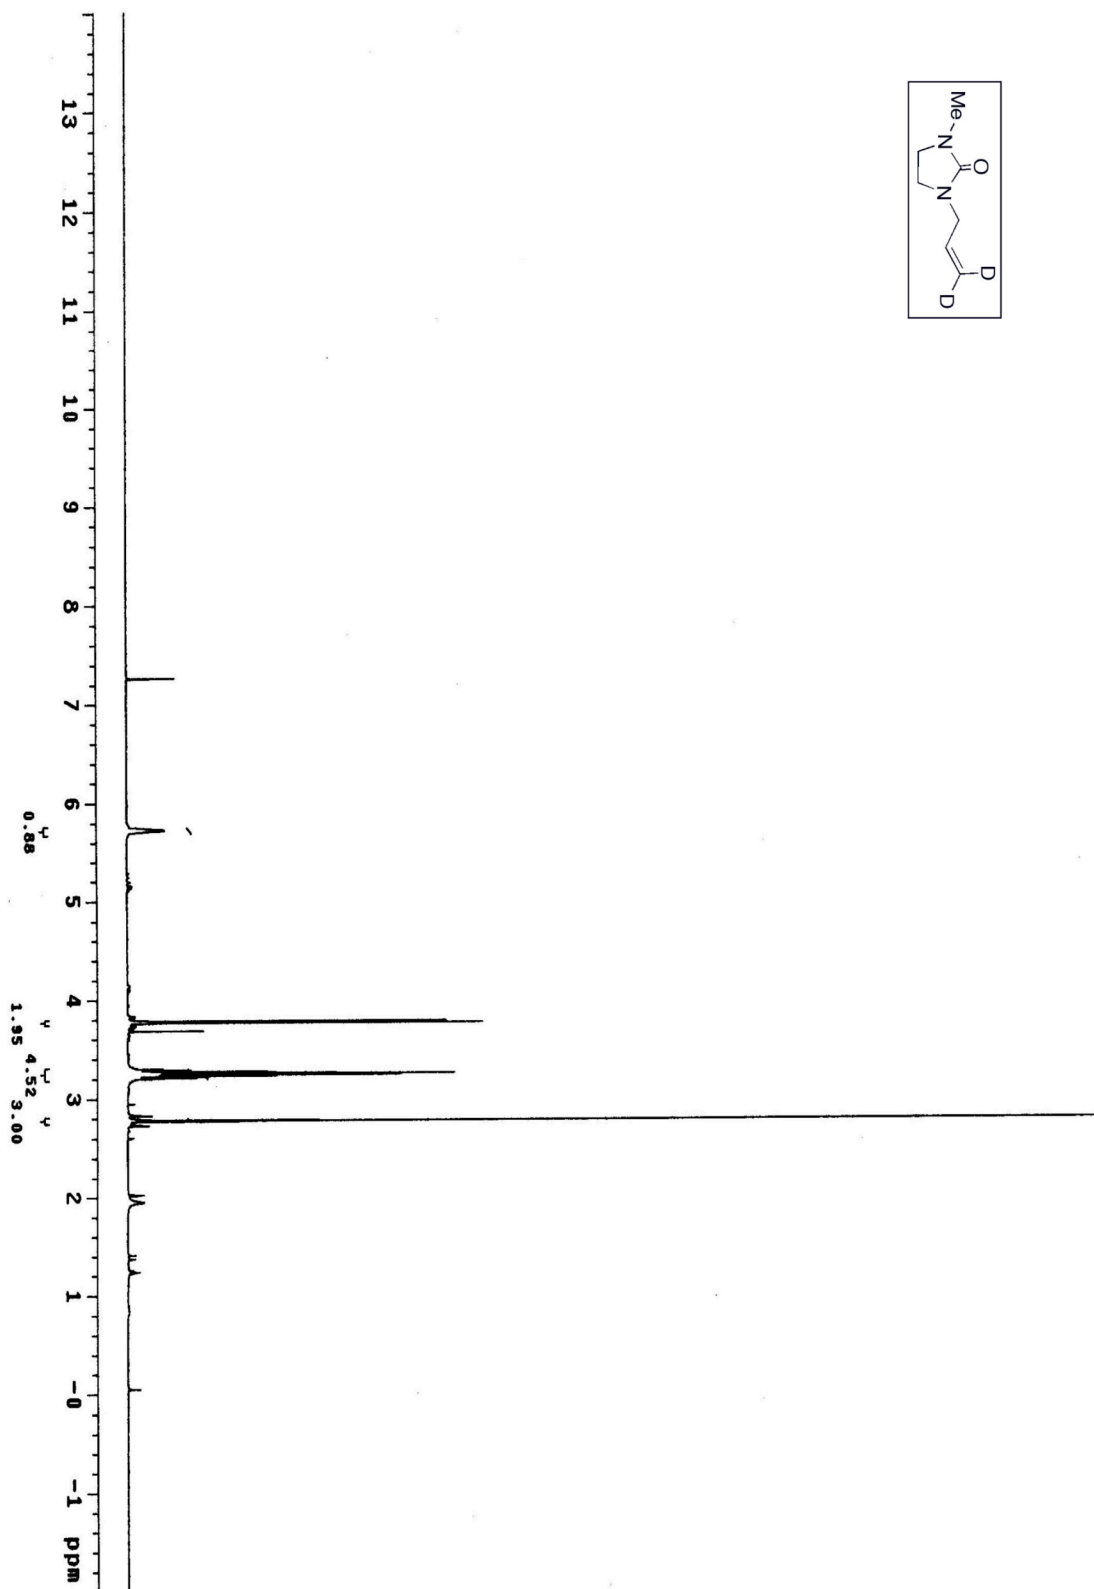

**Figure S18.**  $^{13}\text{C}\{^1\text{H}\}$  NMR spectrum of 1-(3,3-dideuterio-2-propenyl)-3-methylimidazolidin-2-one (**3- $\gamma,\gamma$ - $d_2$** ).

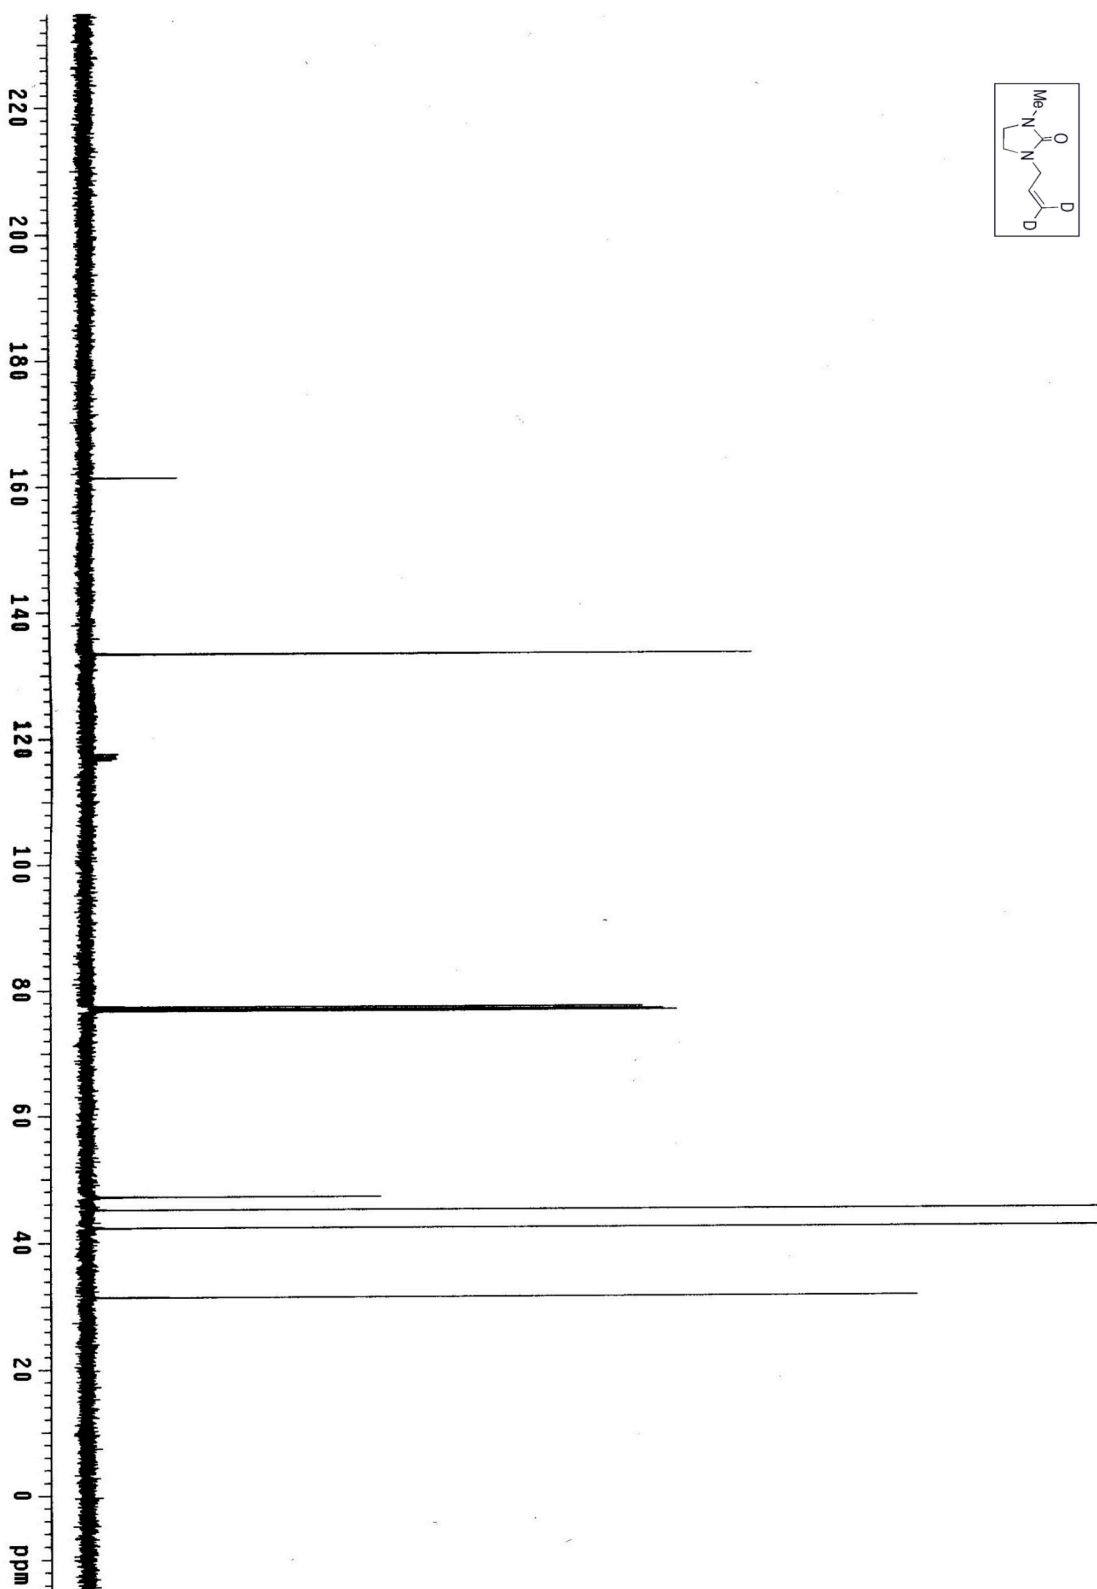

Figure S19.  $^1\text{H}$  NMR spectrum of 1-(2-butenyl)-3-methylimidazolidin-2-one (**4**).

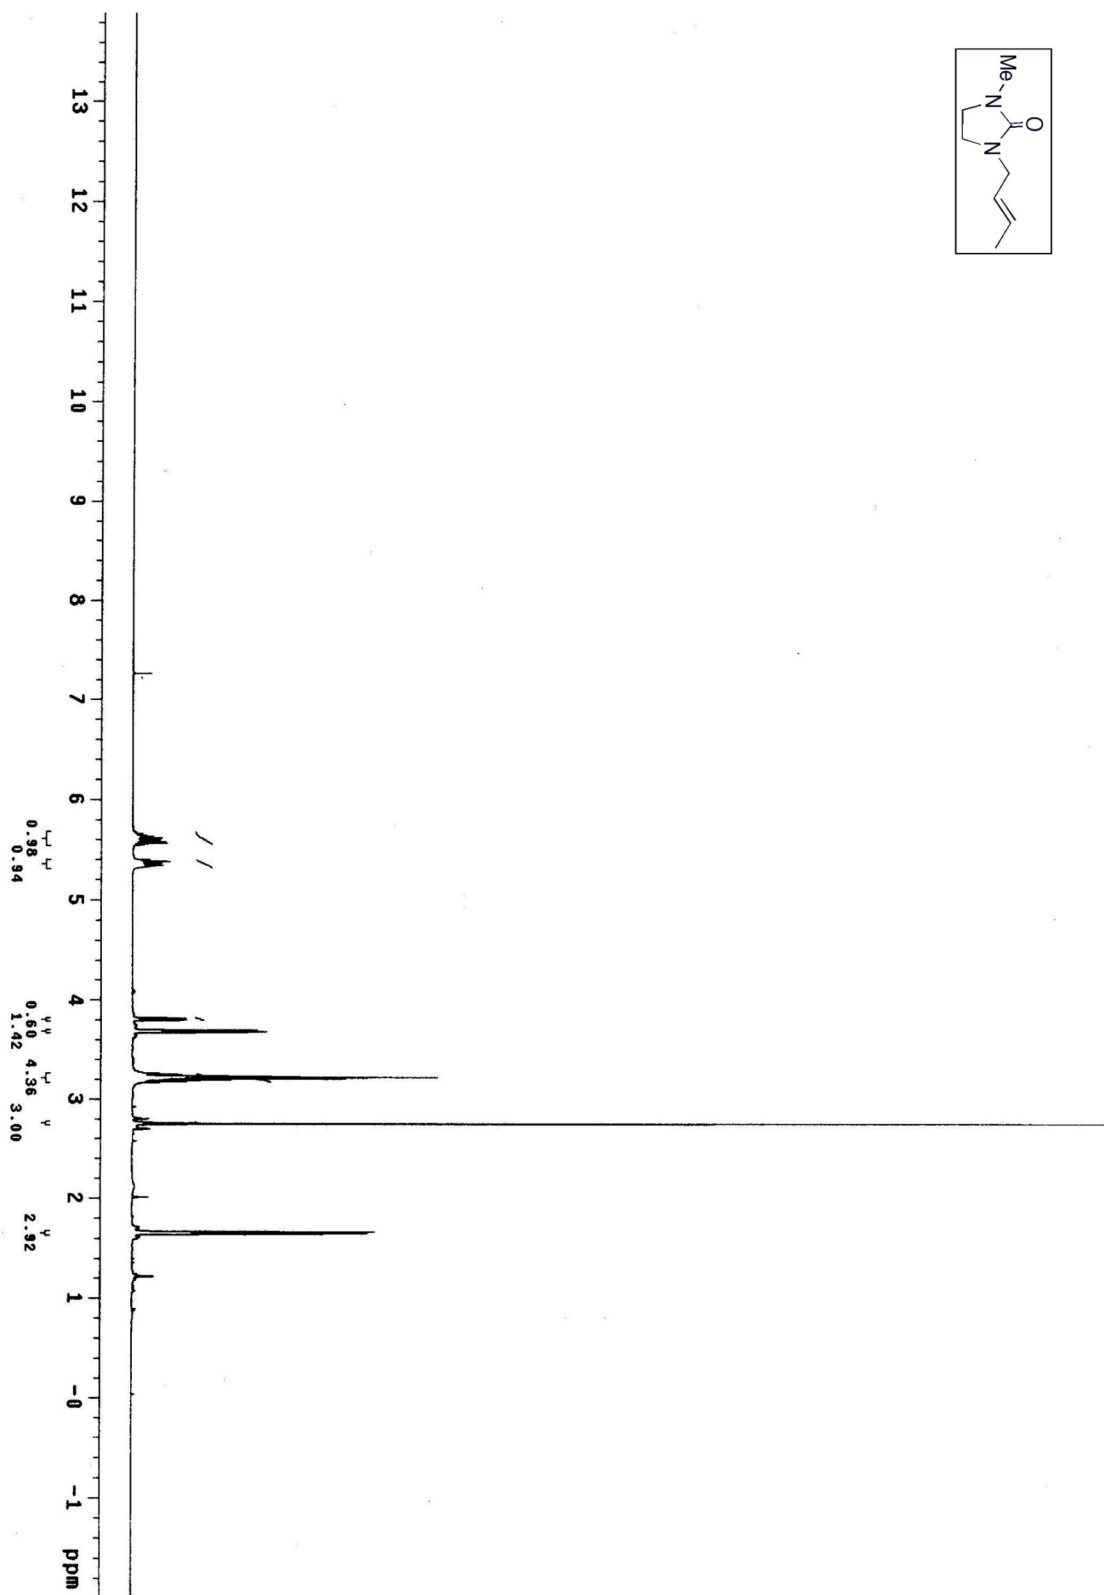

Figure S20.  $^{13}\text{C}\{^1\text{H}\}$  NMR spectrum of 1-(2-butenyl)-3-methylimidazolidin-2-one (**4**).

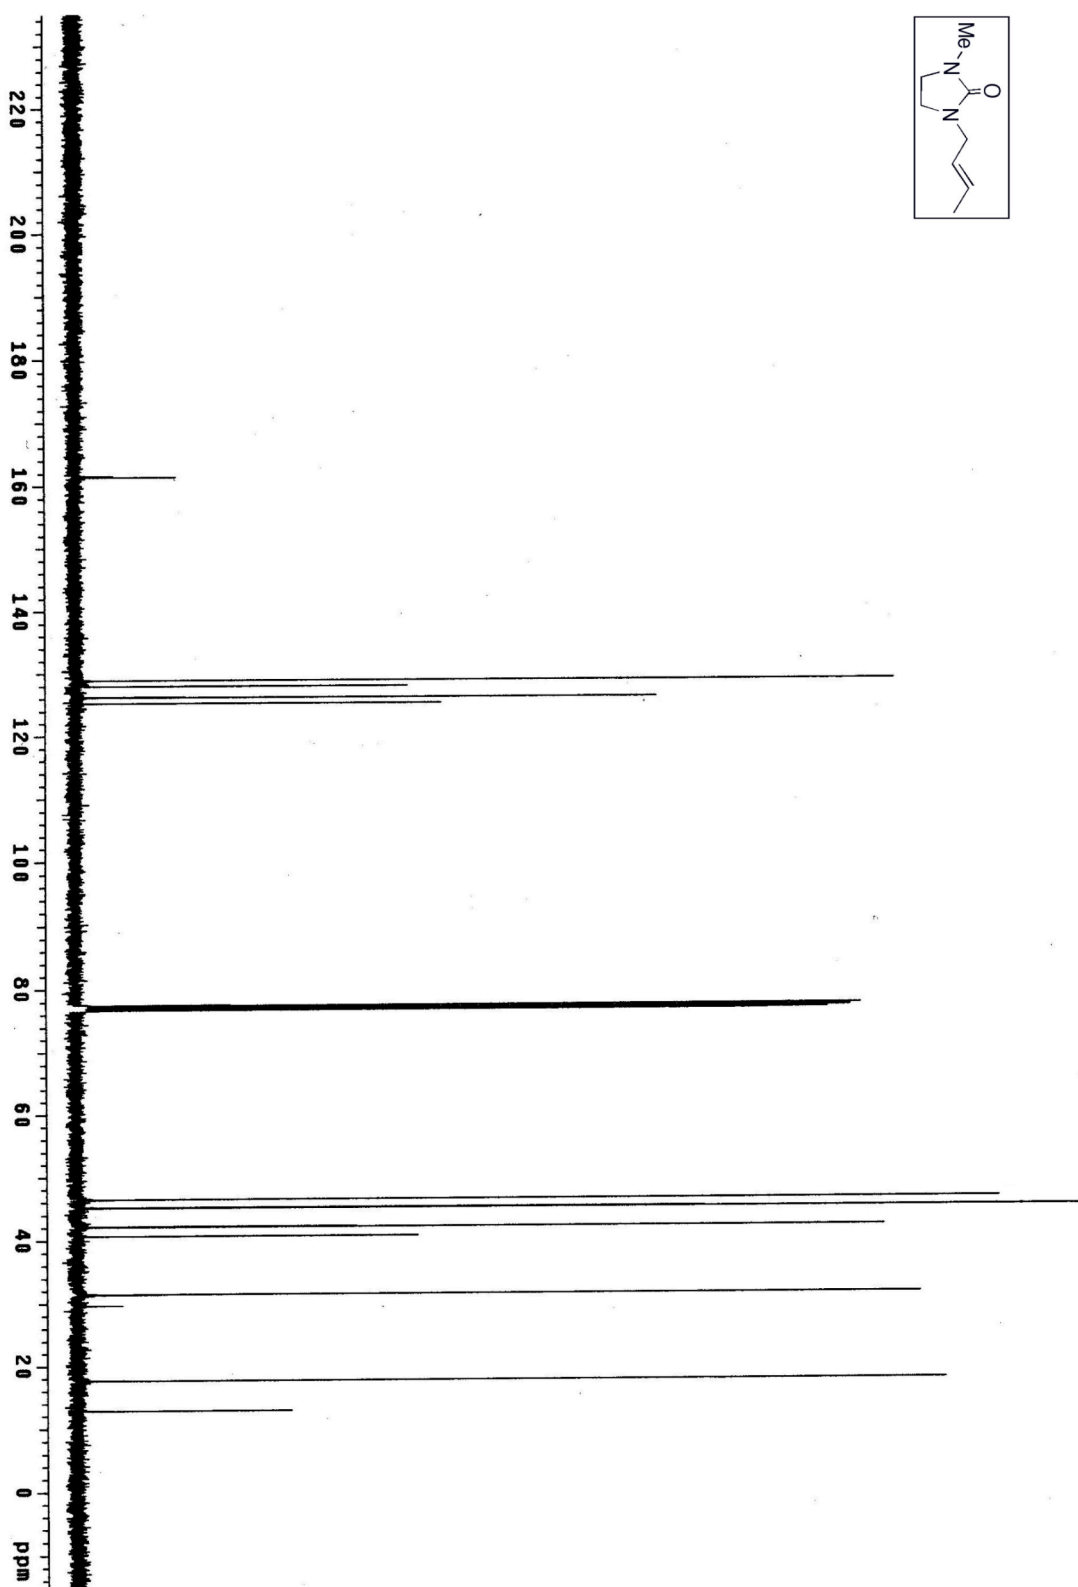



Figure S21. <sup>1</sup>H NMR spectrum of (*E*)-1-cinnamyl-3-methylimidazolidin-2-one [(*E*)-5].

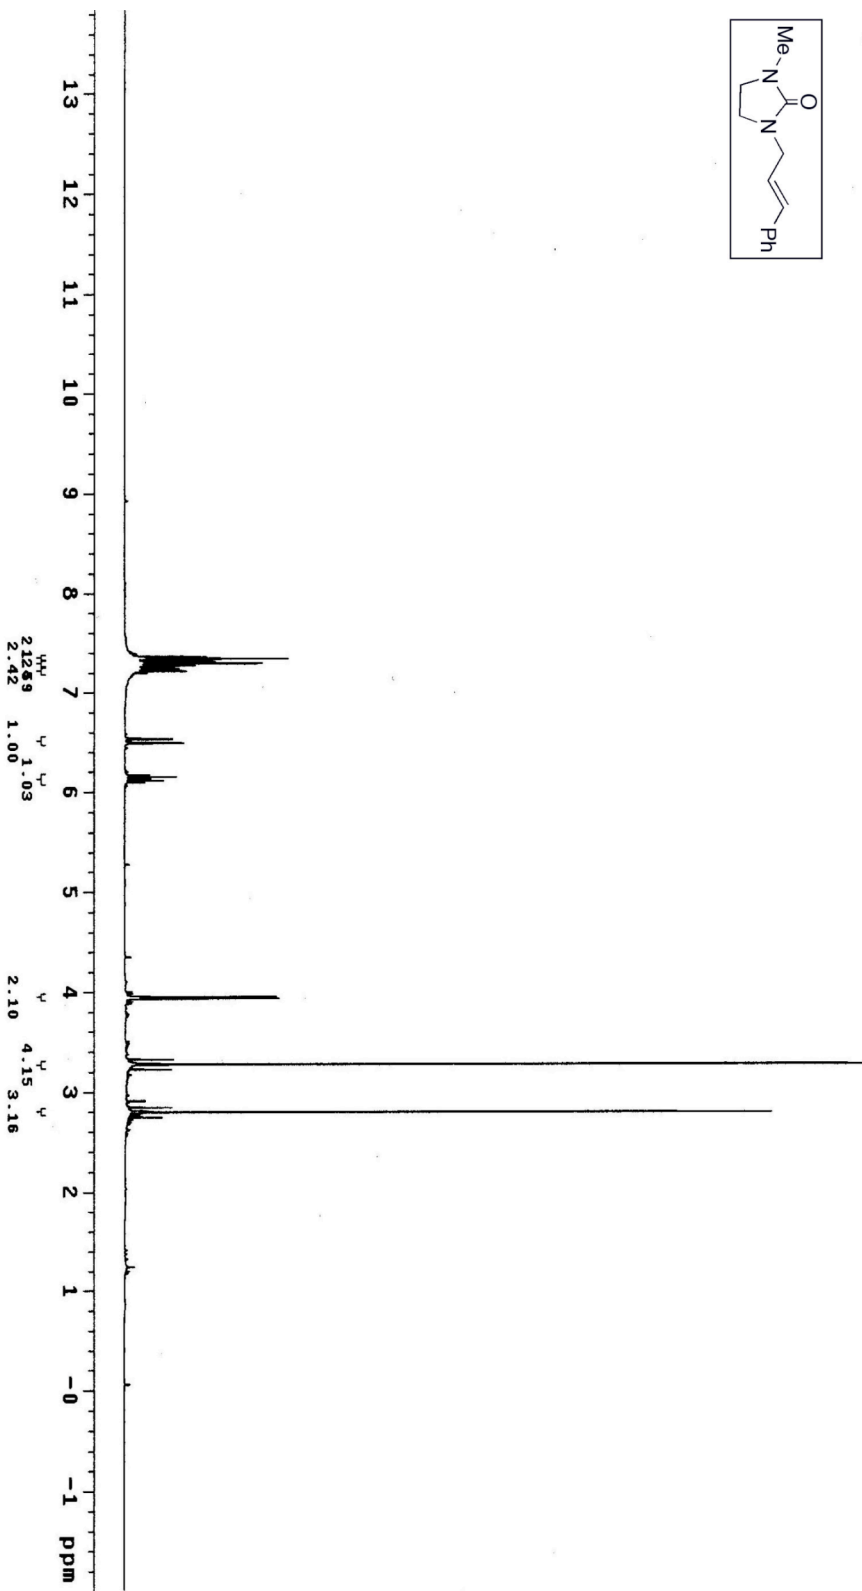

Figure S22.  $^{13}\text{C}\{^1\text{H}\}$  NMR of (*E*)-1-cinnamyl-3-methylimidazolidin-2-one [(*E*)-5].

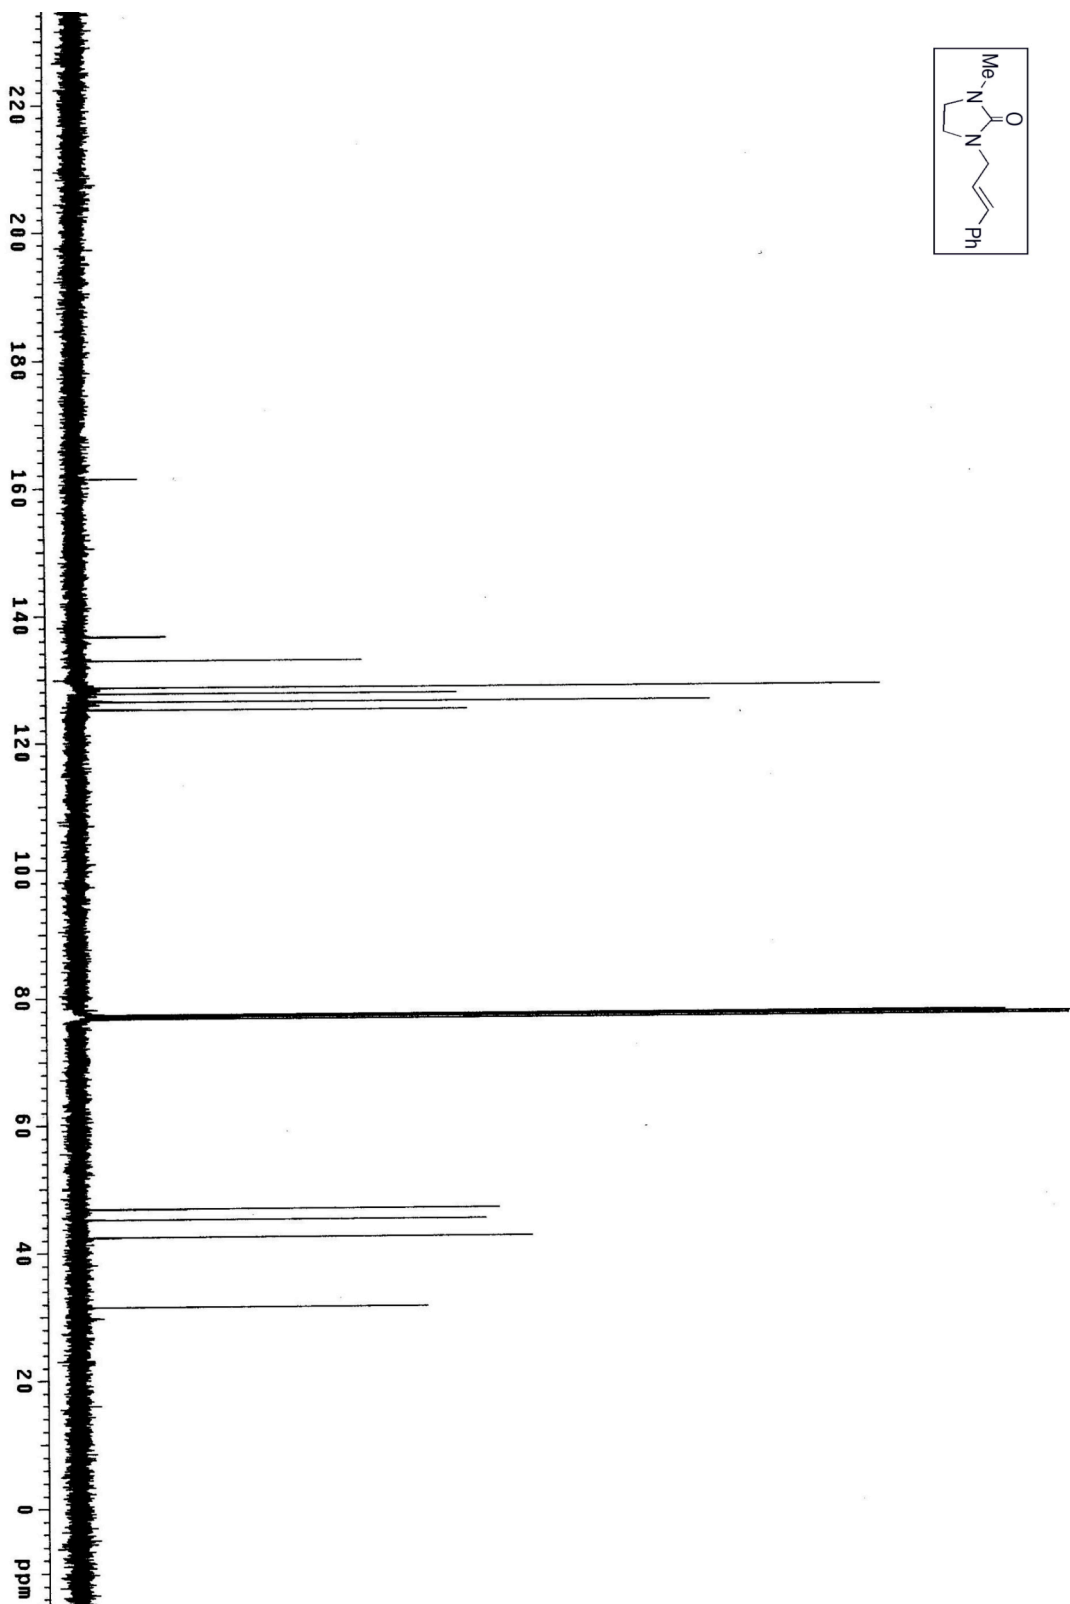

Figure S23. <sup>1</sup>H NMR spectrum of a 6.7:1 mixture of (*E*)-5 and (*Z*)-5.

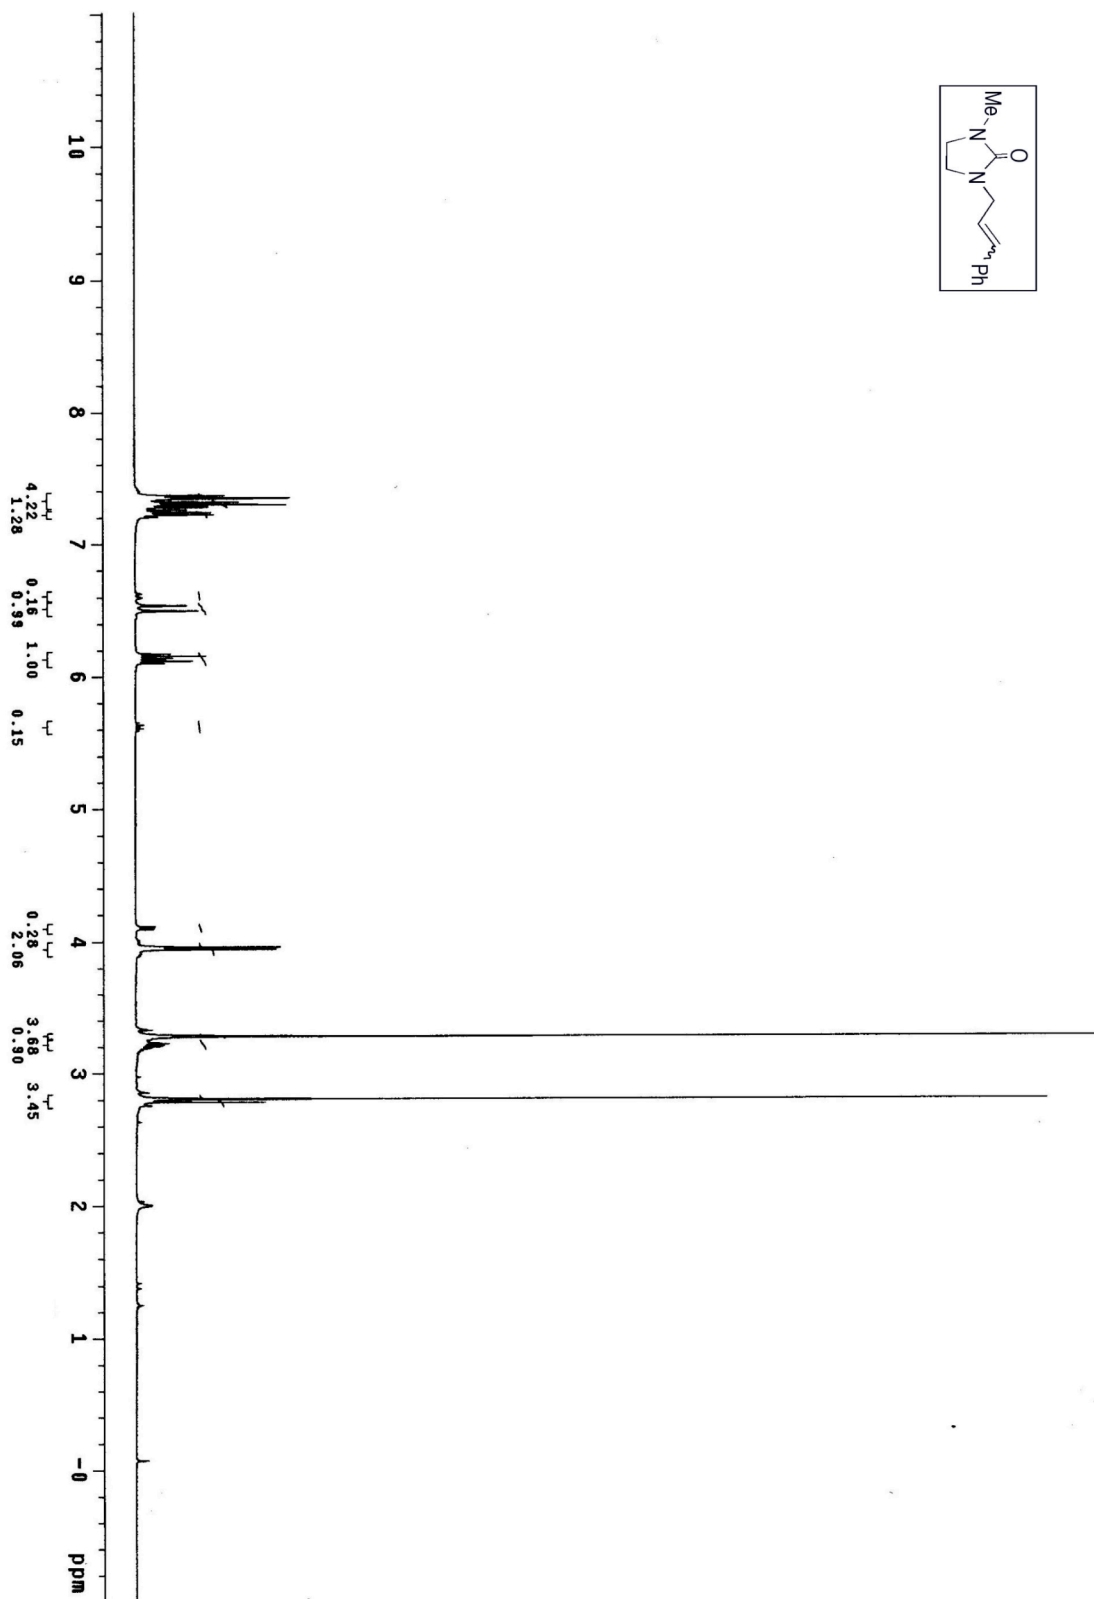

Figure S24.  $^{13}\text{C}\{^1\text{H}\}$  NMR spectrum of a 6.7:1 mixture of (*E*)-5 and (*Z*)-5.

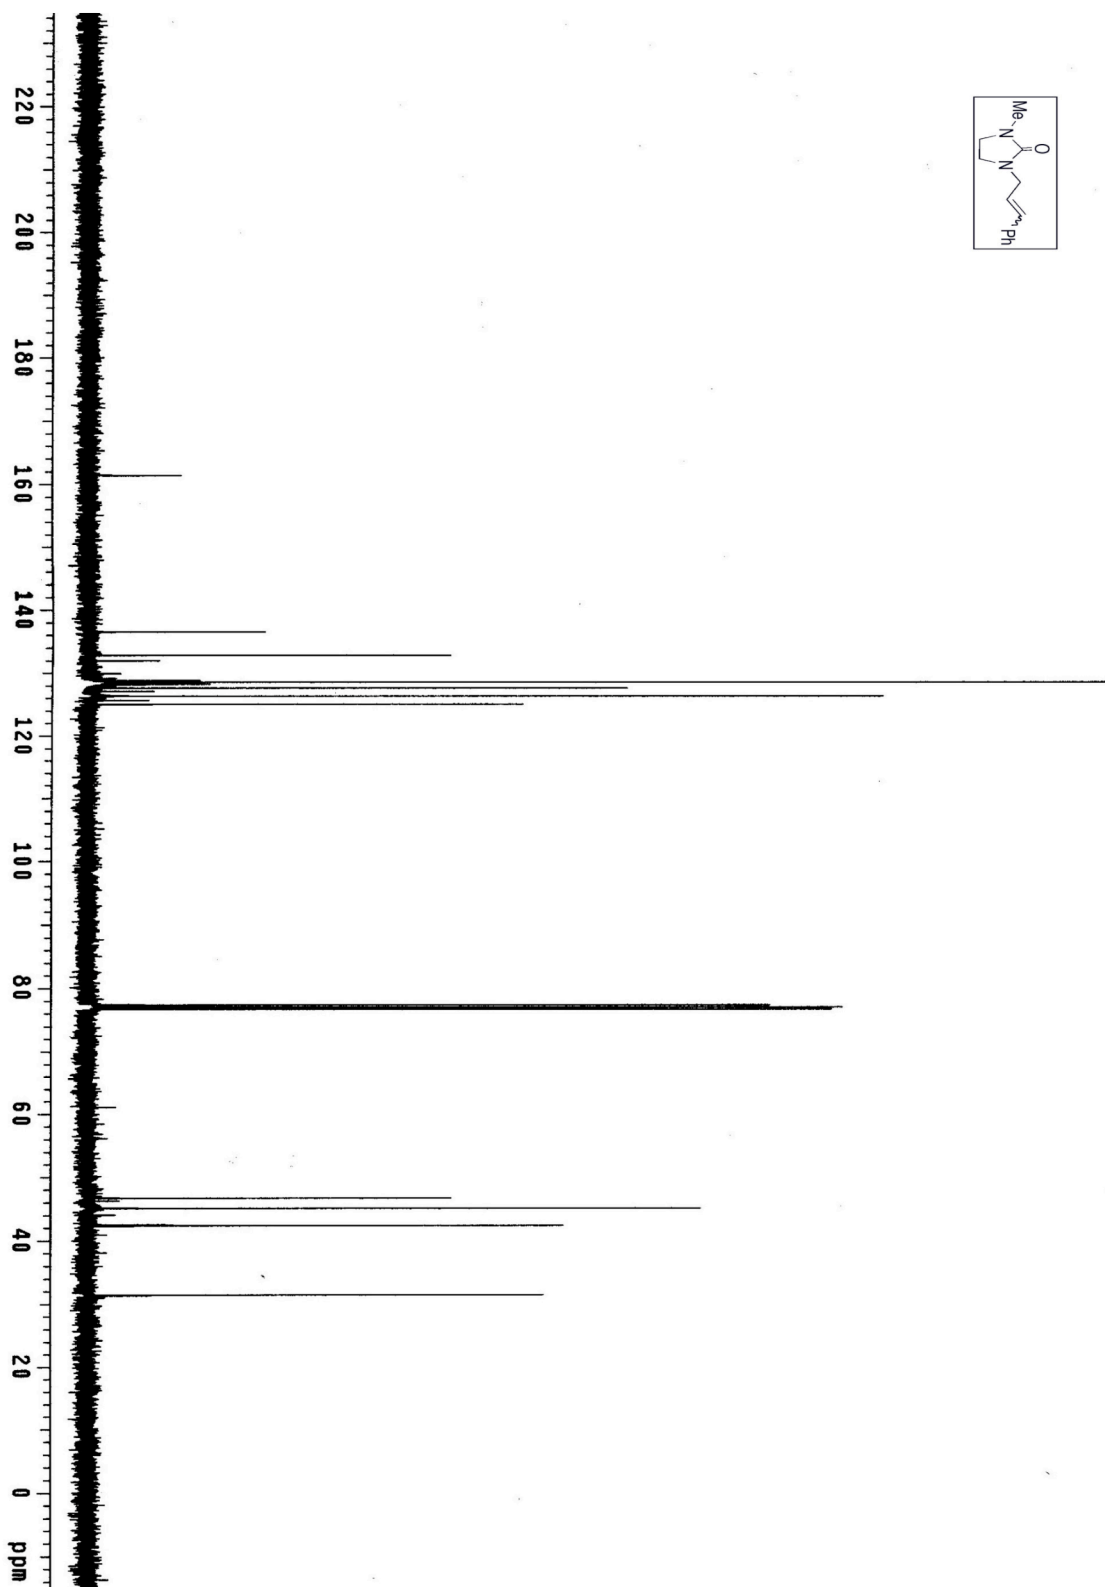

**Figure S25.**  $^1\text{H}$  NMR spectrum of 1-methyl-3-(3-methylbut-2-enyl)imidazolidin-2-one (**6a**).

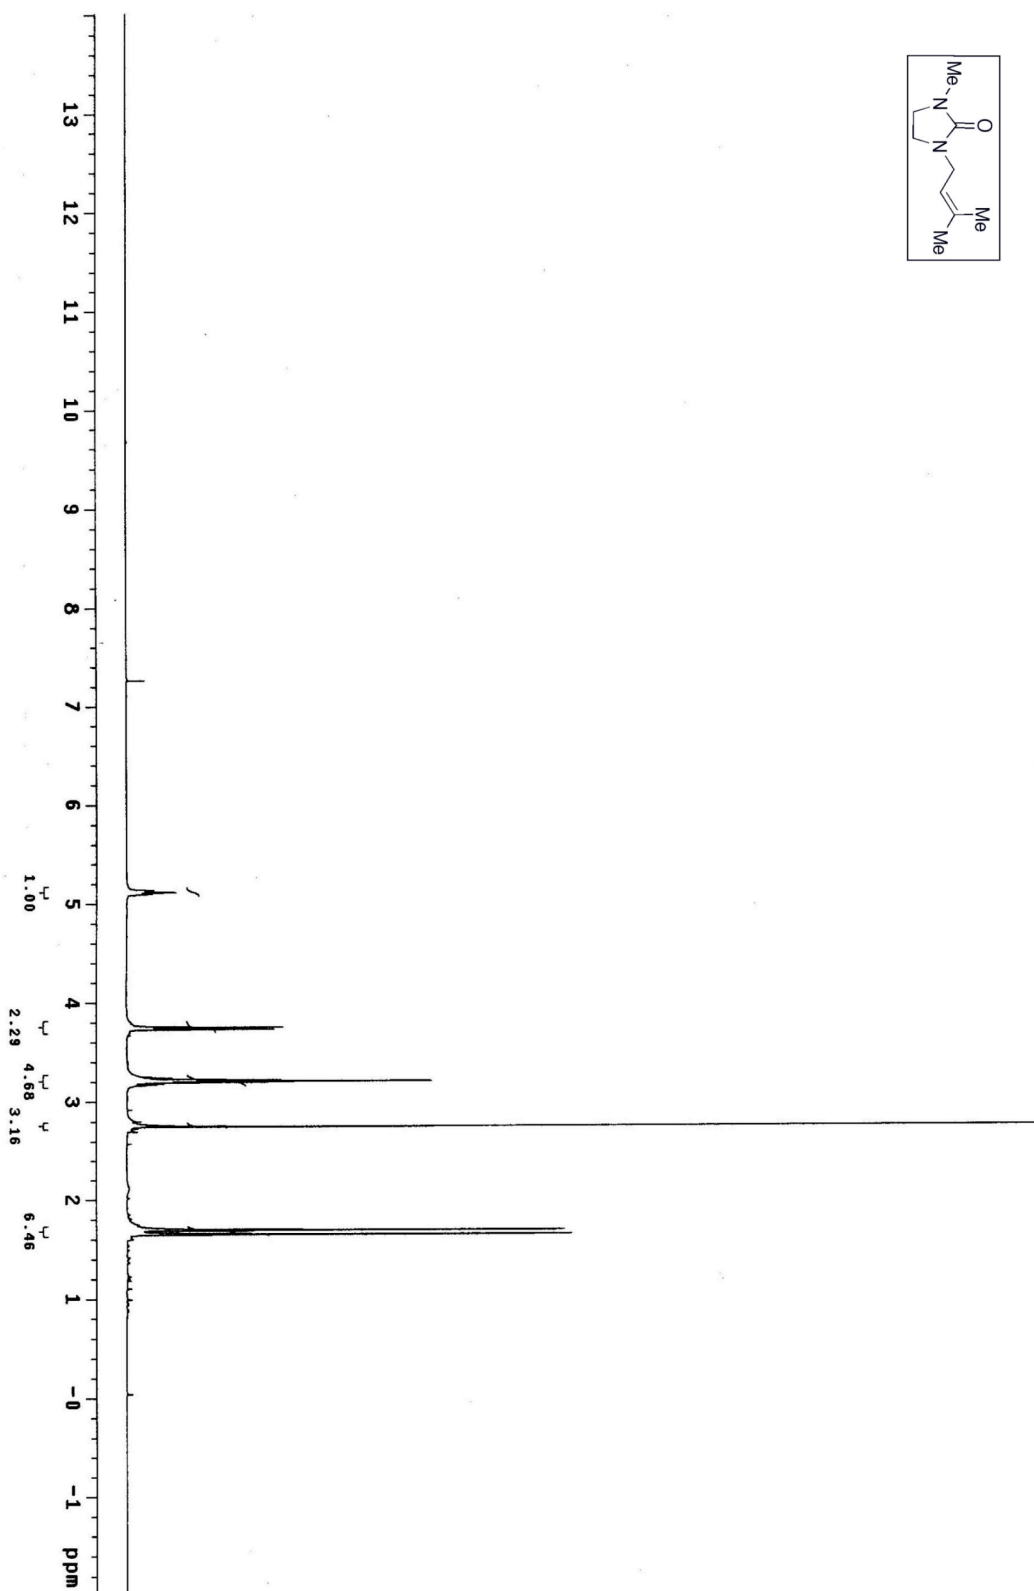

**Figure S26.**  $^{13}\text{C}\{^1\text{H}\}$  NMR spectrum of 1-methyl-3-(3-methylbut-2-enyl)imidazolidin-2-one (6a).

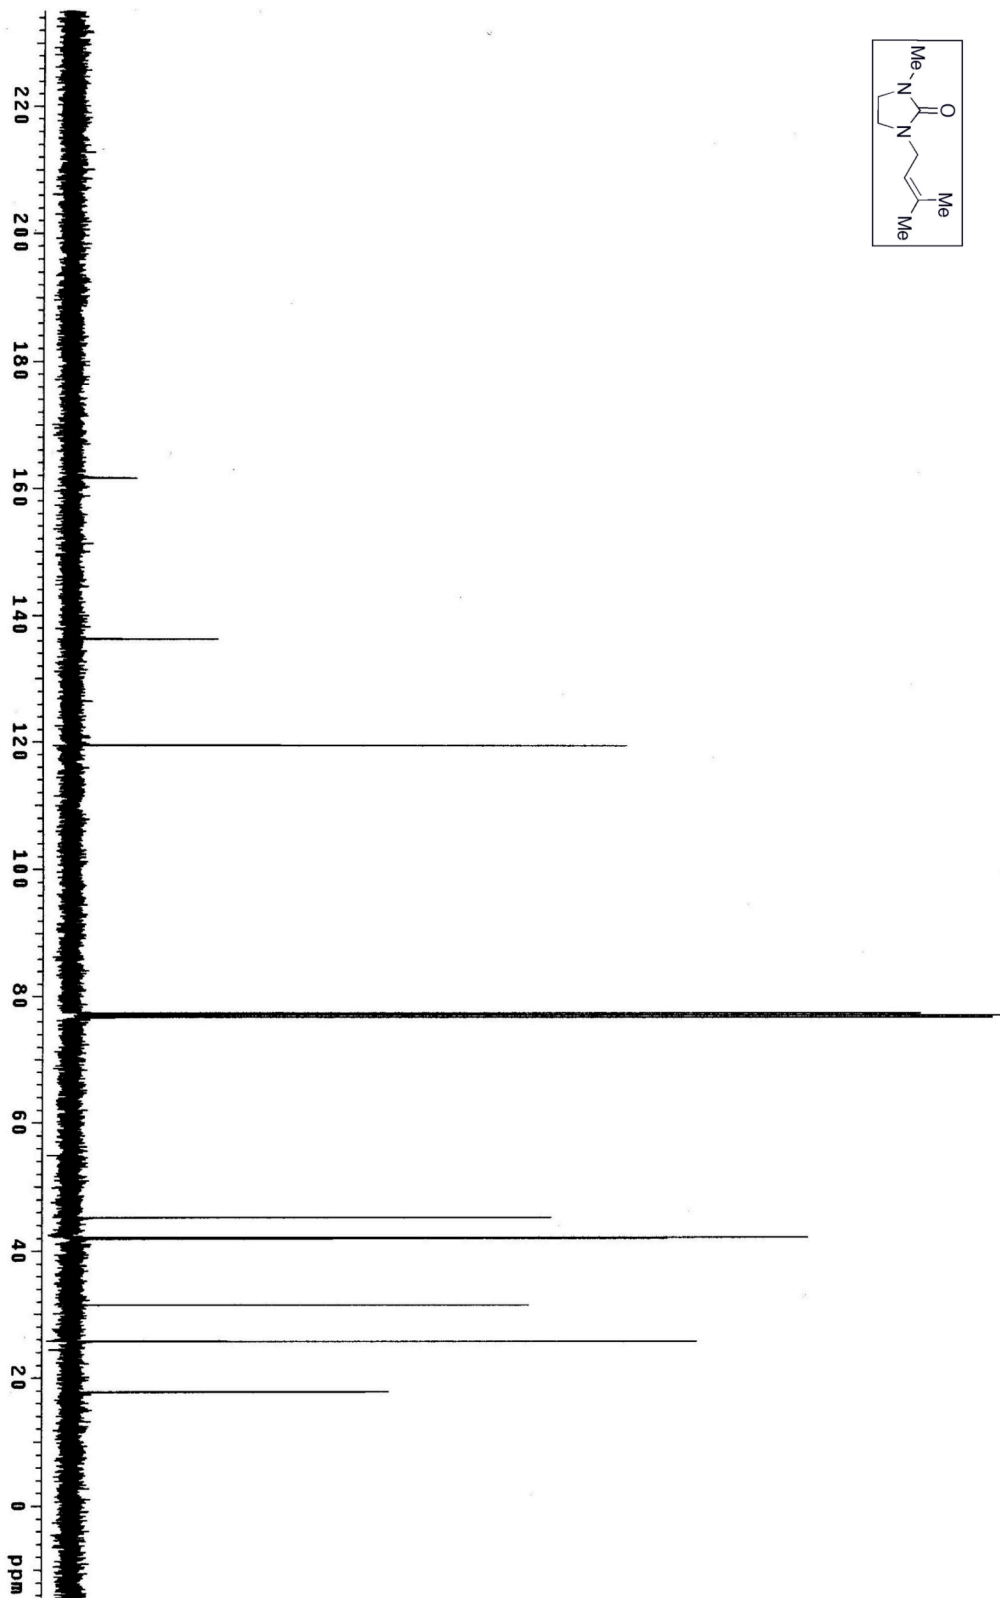

**Figure S27.**  $^1\text{H}$  NMR spectrum of 1-methyl-3-(2-methylbut-3-en-2-yl)imidazolidin-2-one (**6b**).

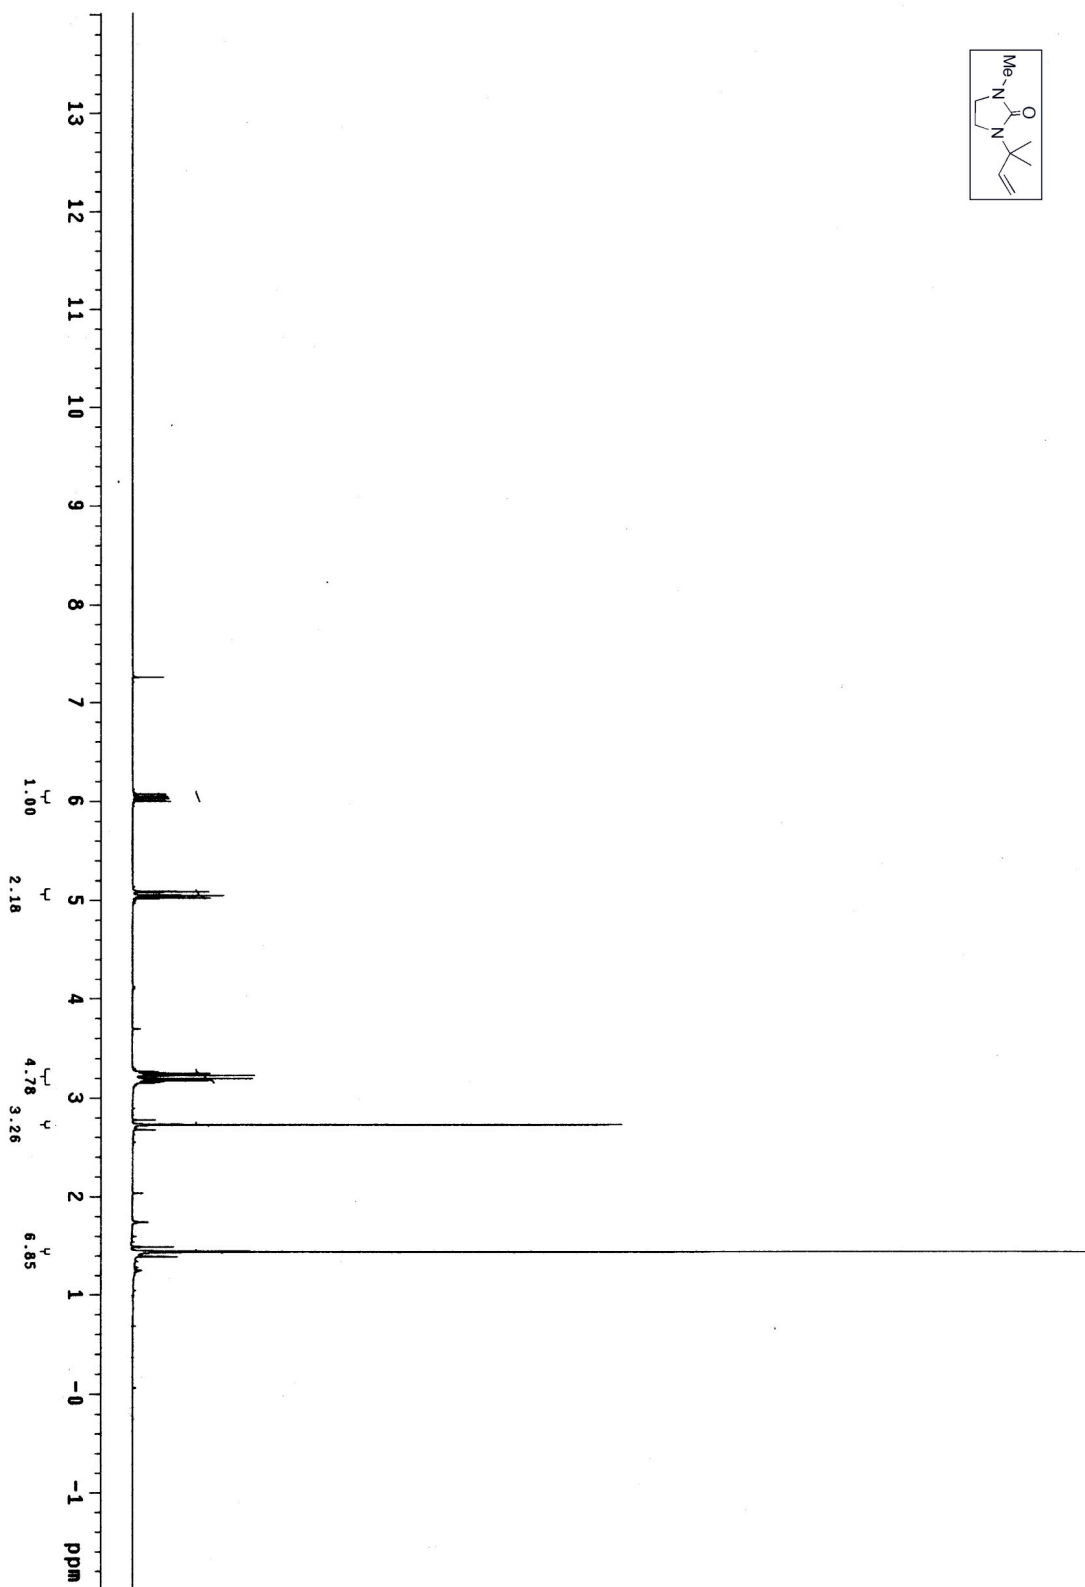

**Figure S28.**  $^{13}\text{C}\{^1\text{H}\}$  NMR spectrum of 1-methyl-3-(2-methylbut-3-en-2-yl)imidazolidin-2-one (**6b**).

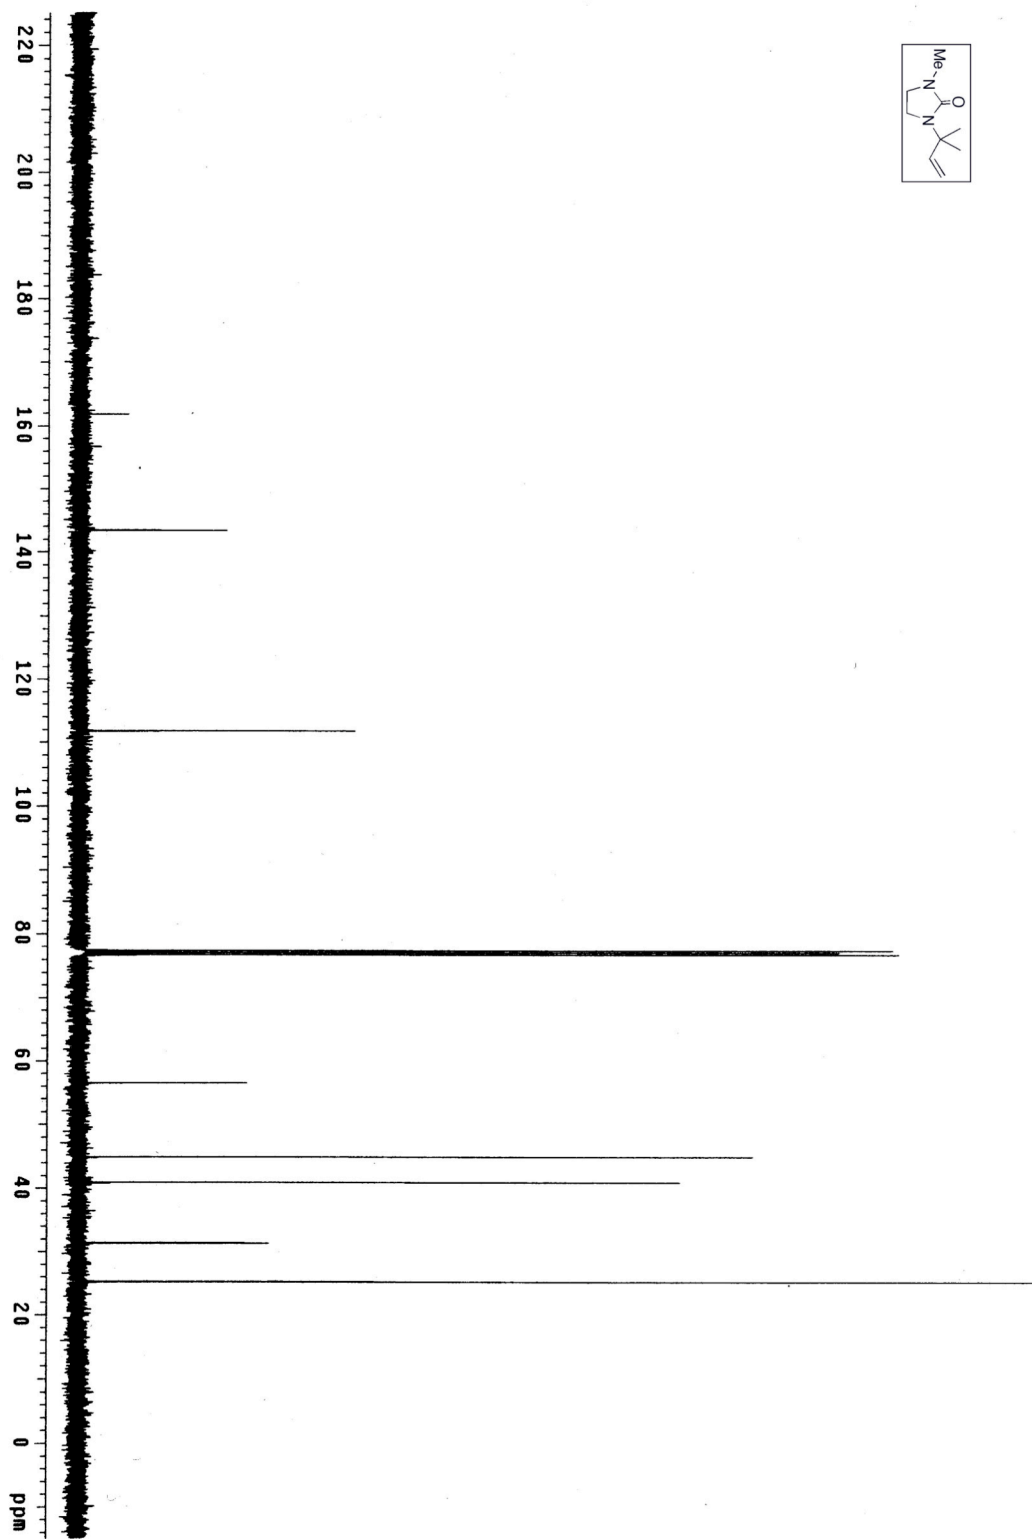



**Figure S29.**  $^1\text{H}$  NMR spectrum of 1-(2-cyclohexylideneethyl)-3-methylimidazolidin-2-one (7).

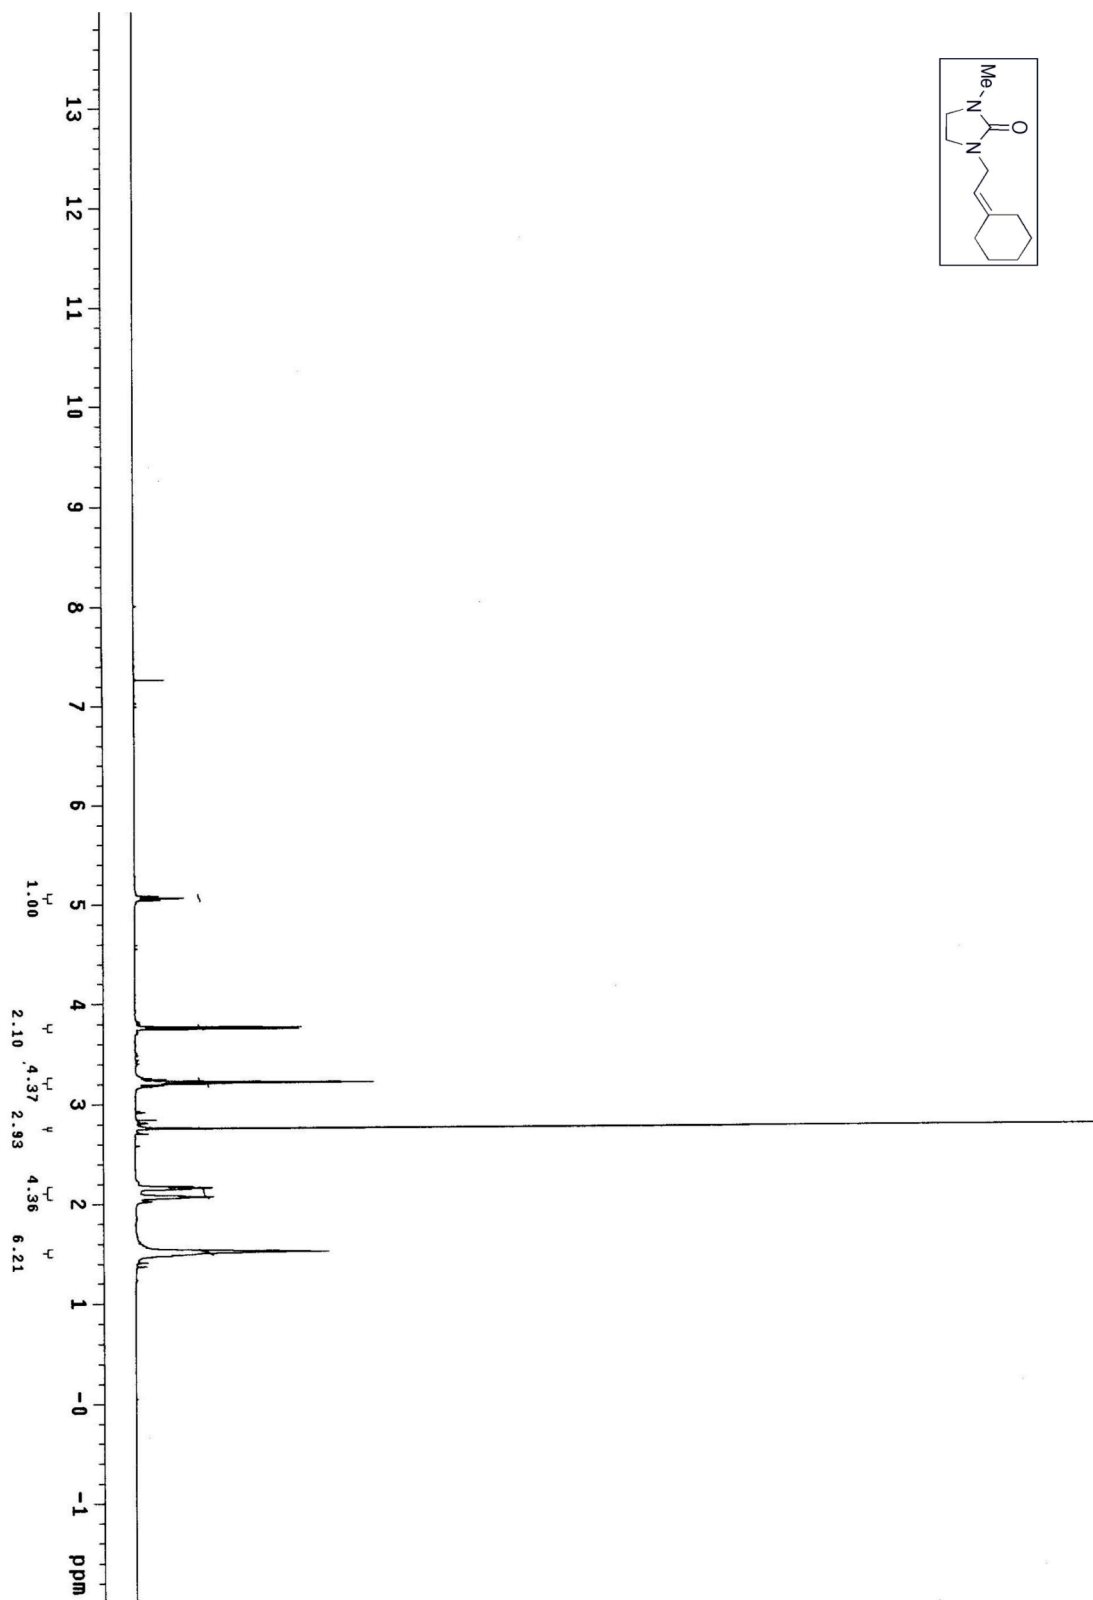

**Figure S30.**  $^{13}\text{C}\{^1\text{H}\}$  NMR spectrum of 1-(2-cyclohexylideneethyl)-3-methylimidazolidin-2-one (7).

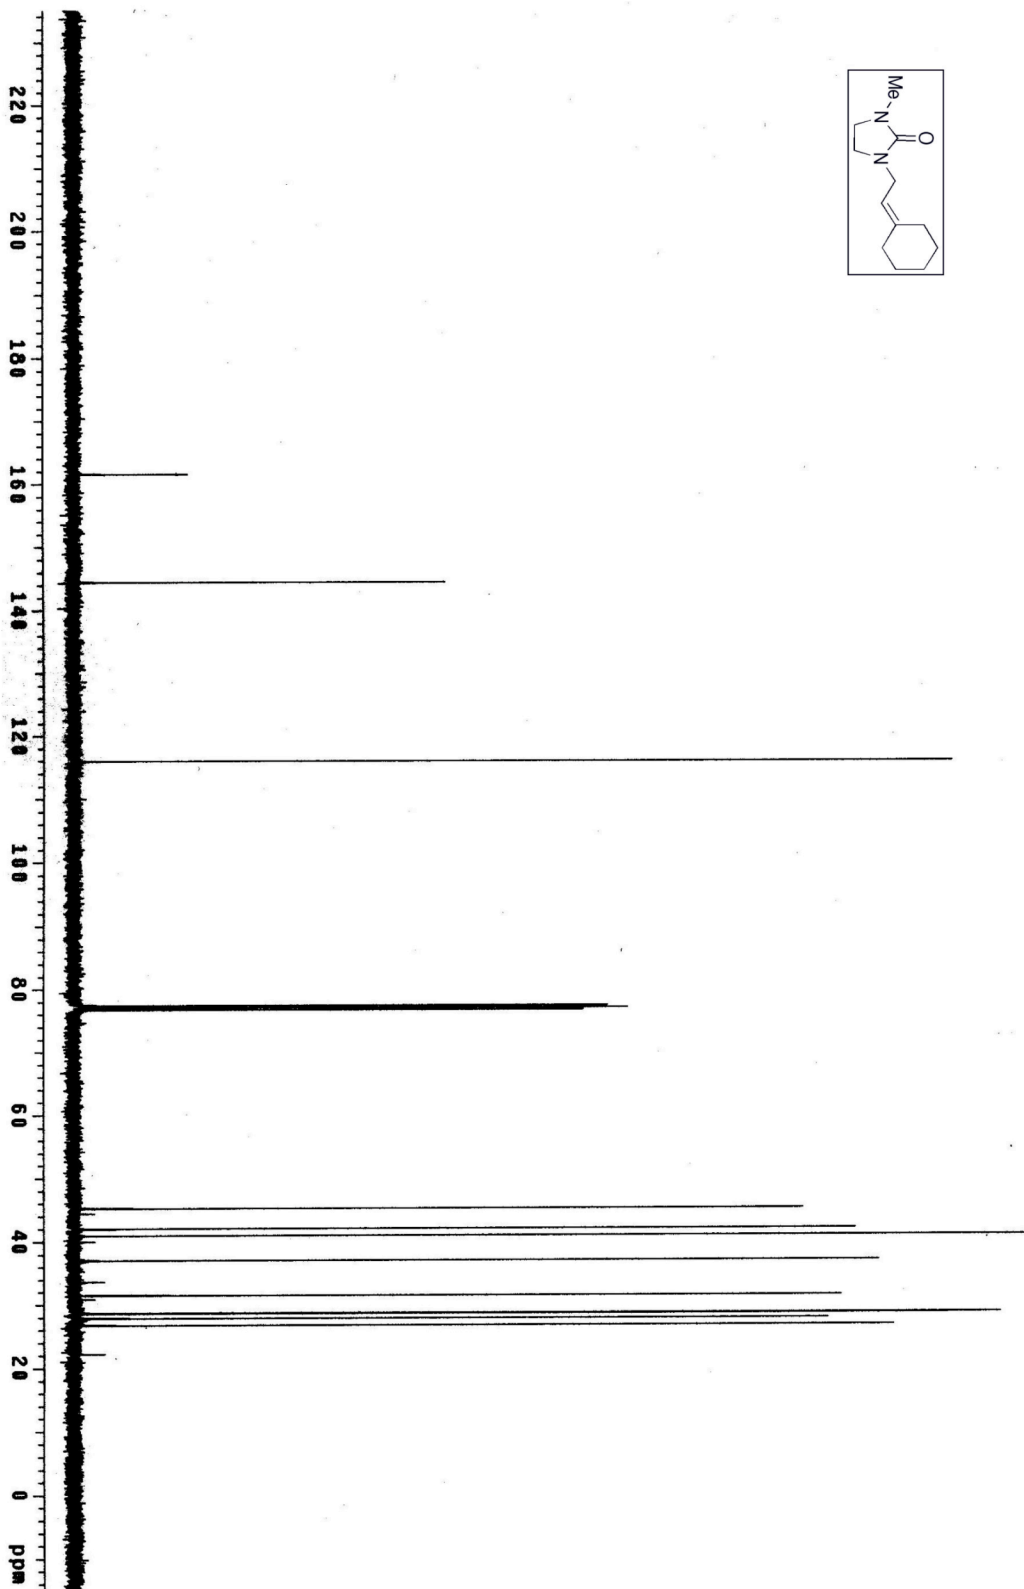

Figure S31.  $^1\text{H}$  NMR spectrum of 1-(but-3-en-2-yl)-3-methylimidazolidin-2-one (**8**).

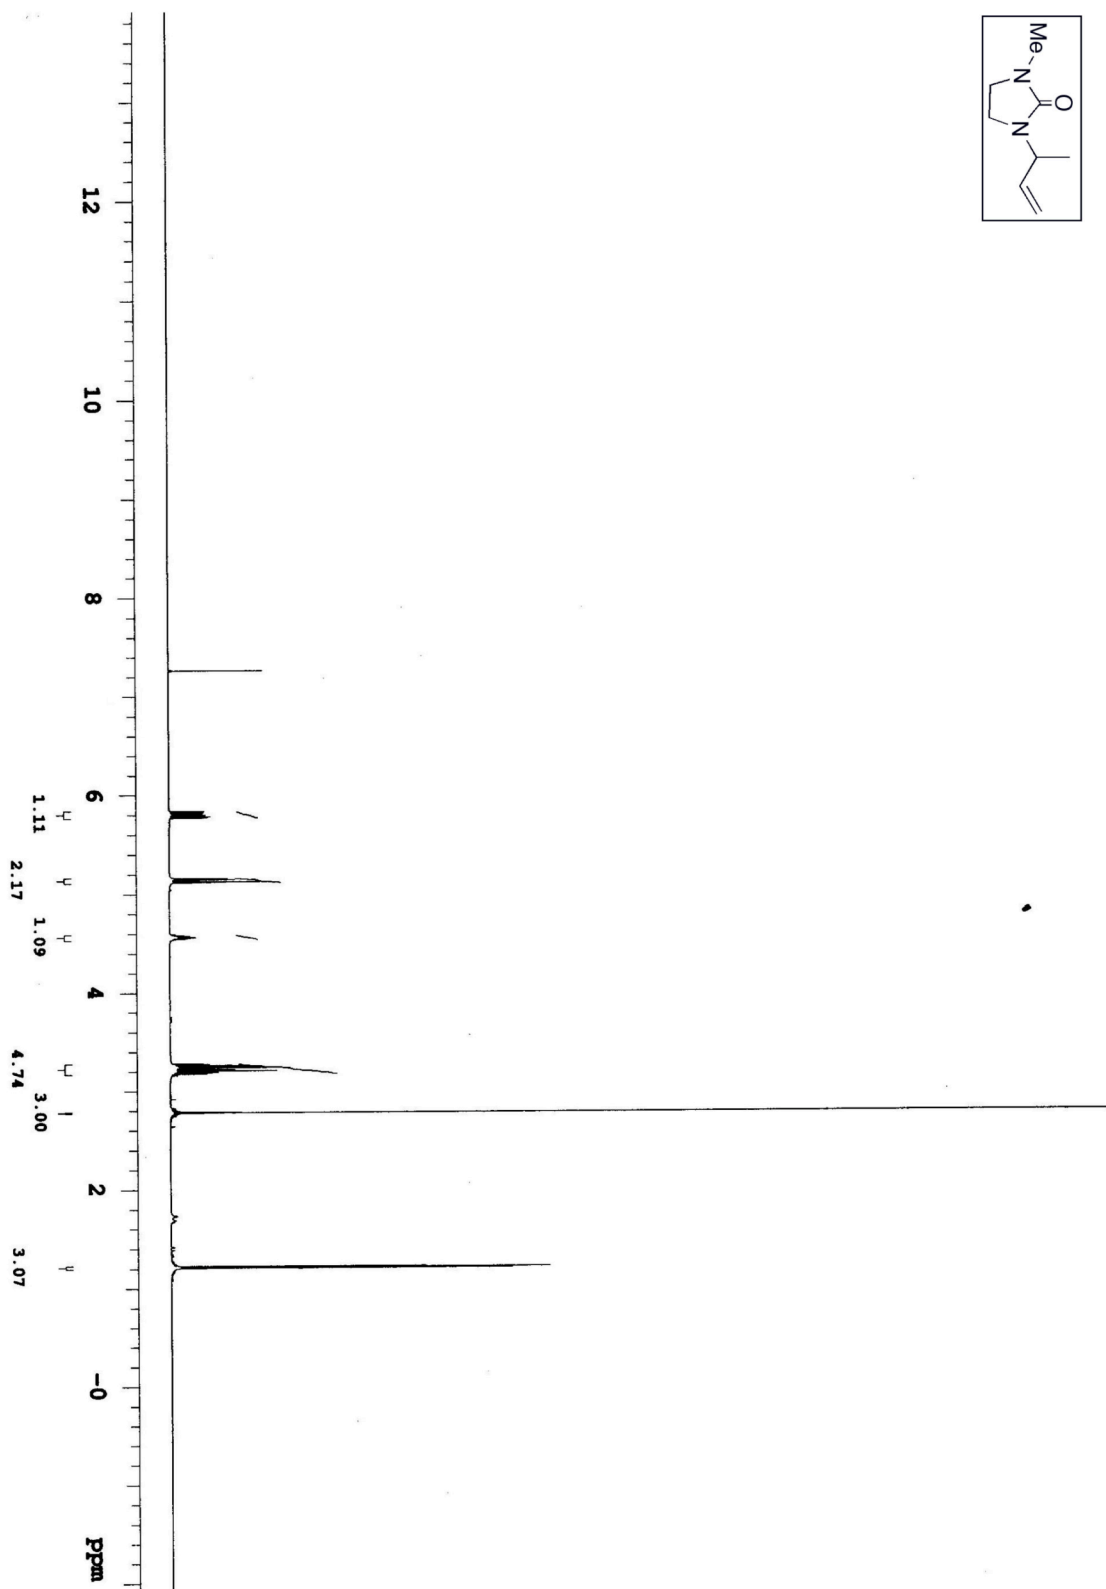

Figure S32.  $^{13}\text{C}\{^1\text{H}\}$  NMR spectrum of 1-(but-3-en-2-yl)-3-methylimidazolidin-2-one (**8**).

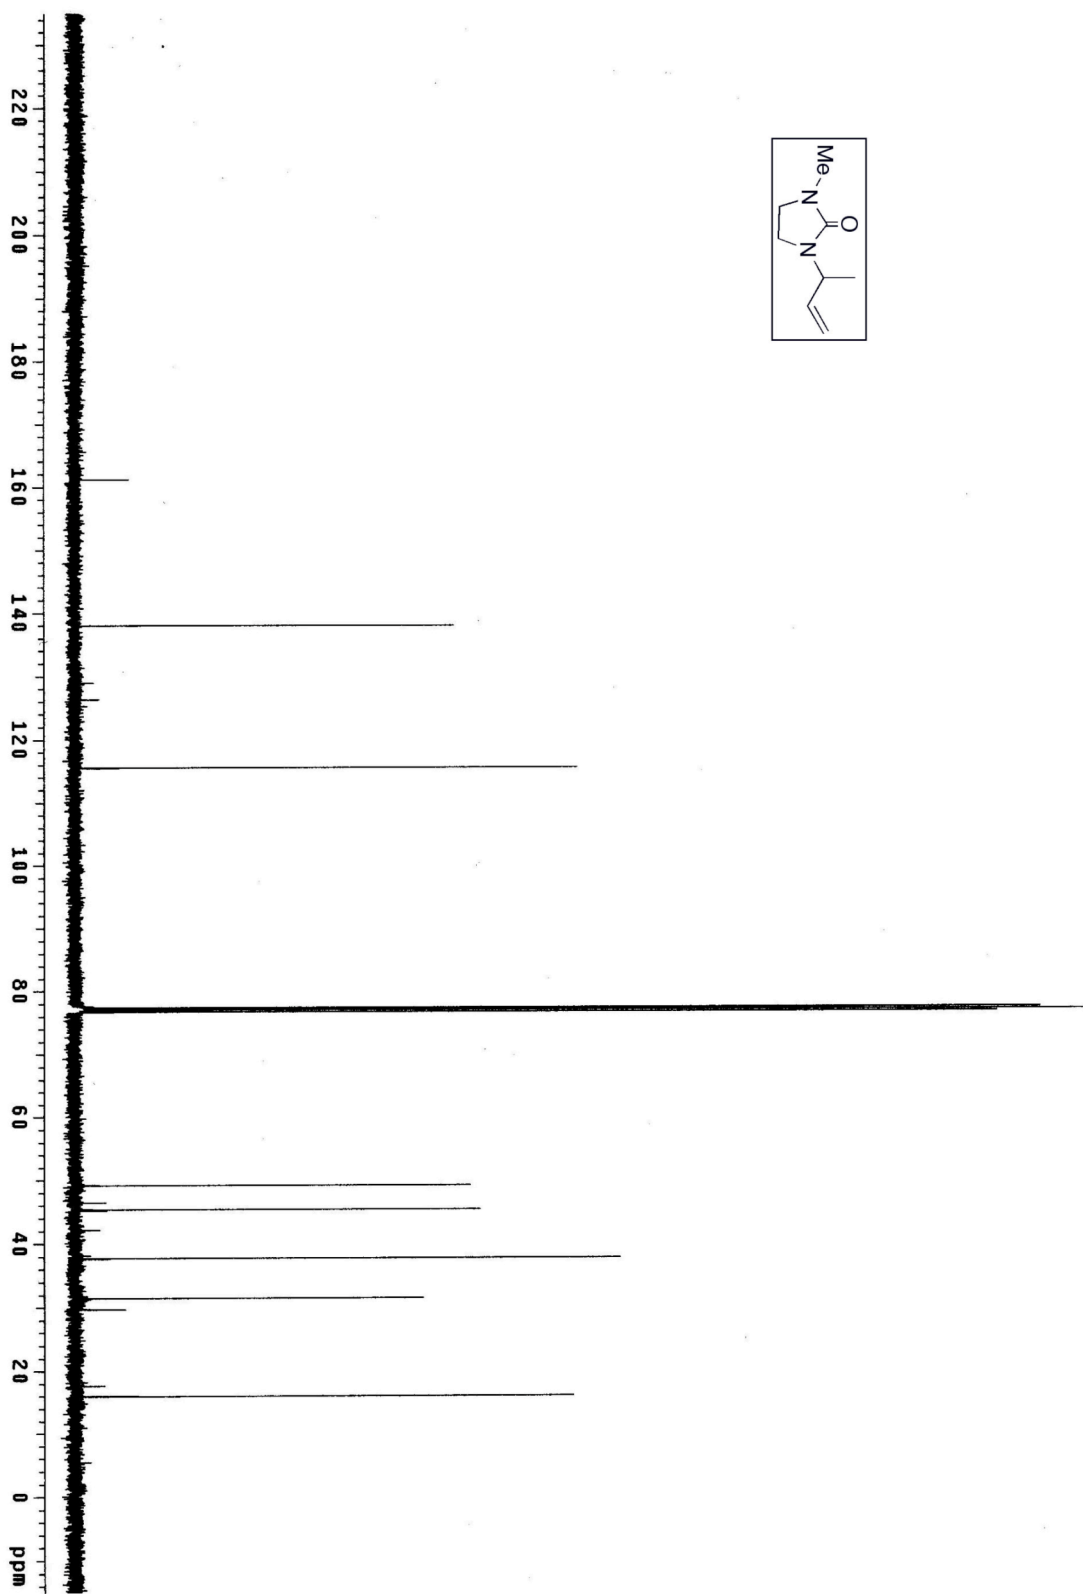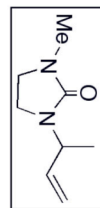

**Figure S33.**  $^1\text{H}$  NMR spectrum of 1-(cyclohex-2-enyl)-3-methylimidazolidin-2-one (**9**).

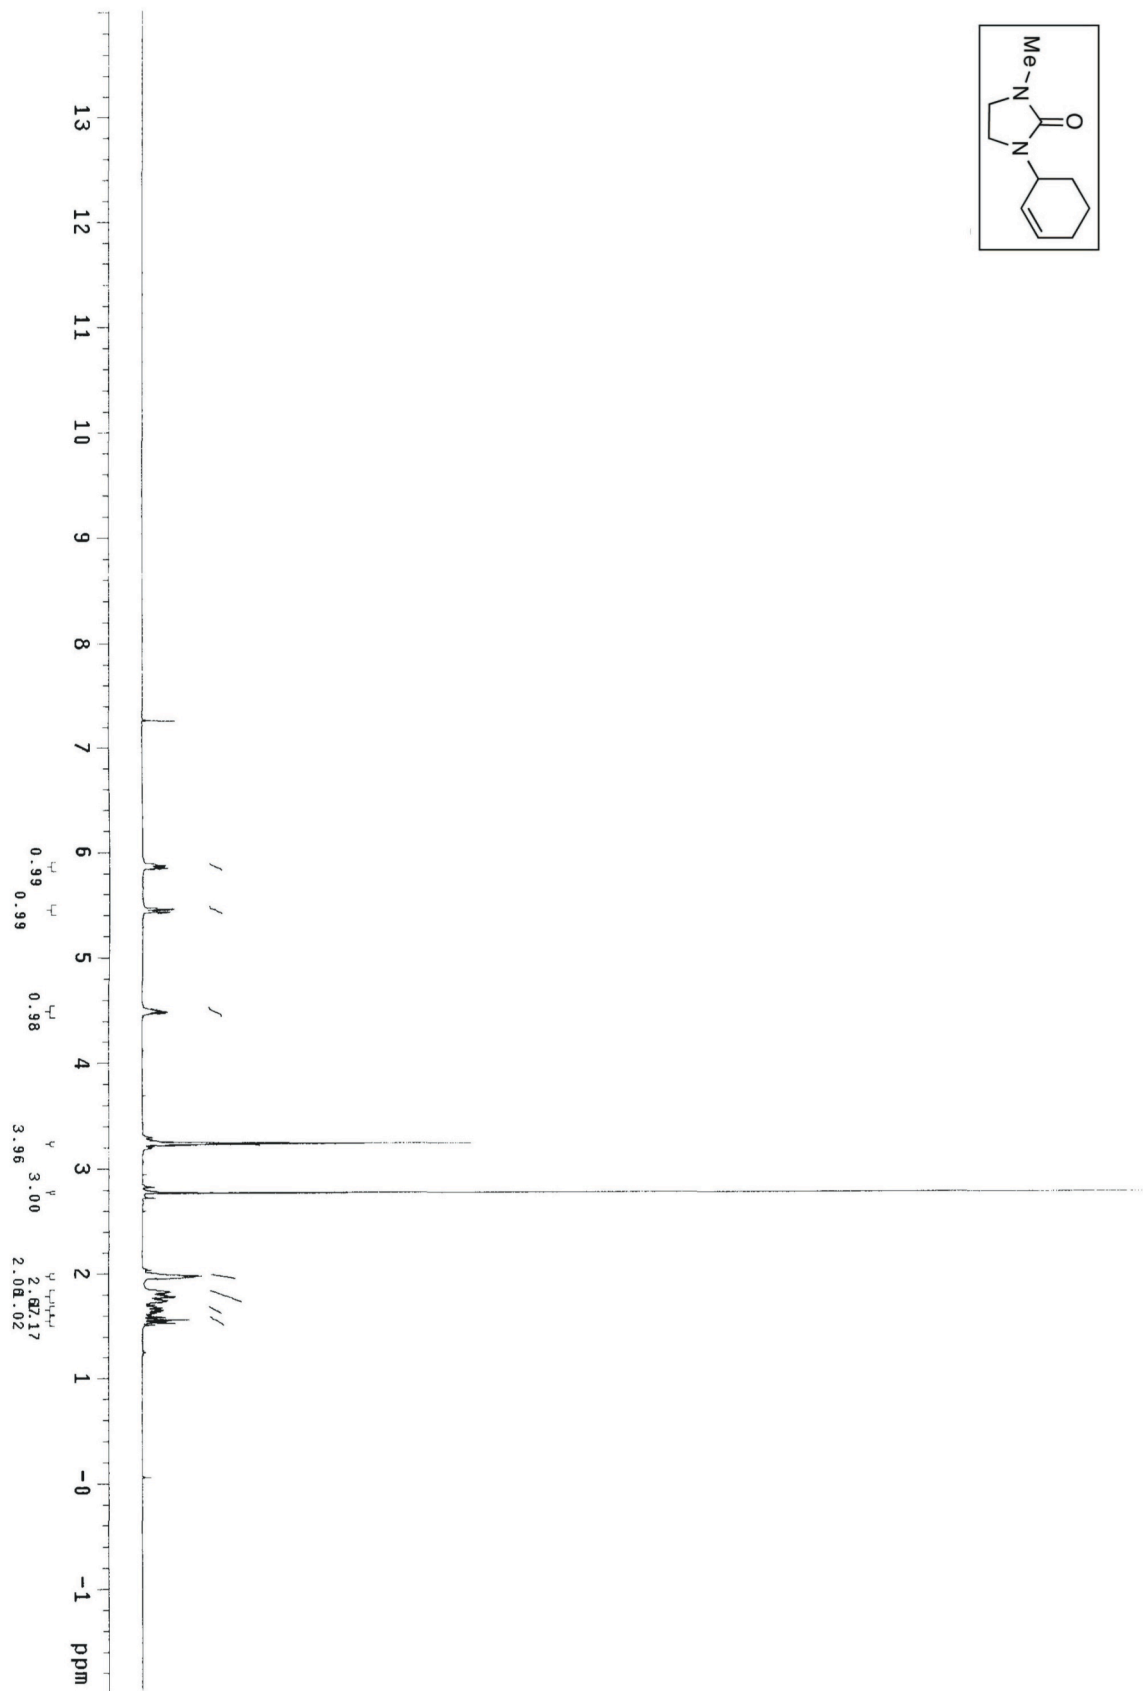

**Figure S34.**  $^{13}\text{C}\{^1\text{H}\}$  NMR spectrum of 1-(cyclohex-2-enyl)-3-methylimidazolidin-2-one (9).

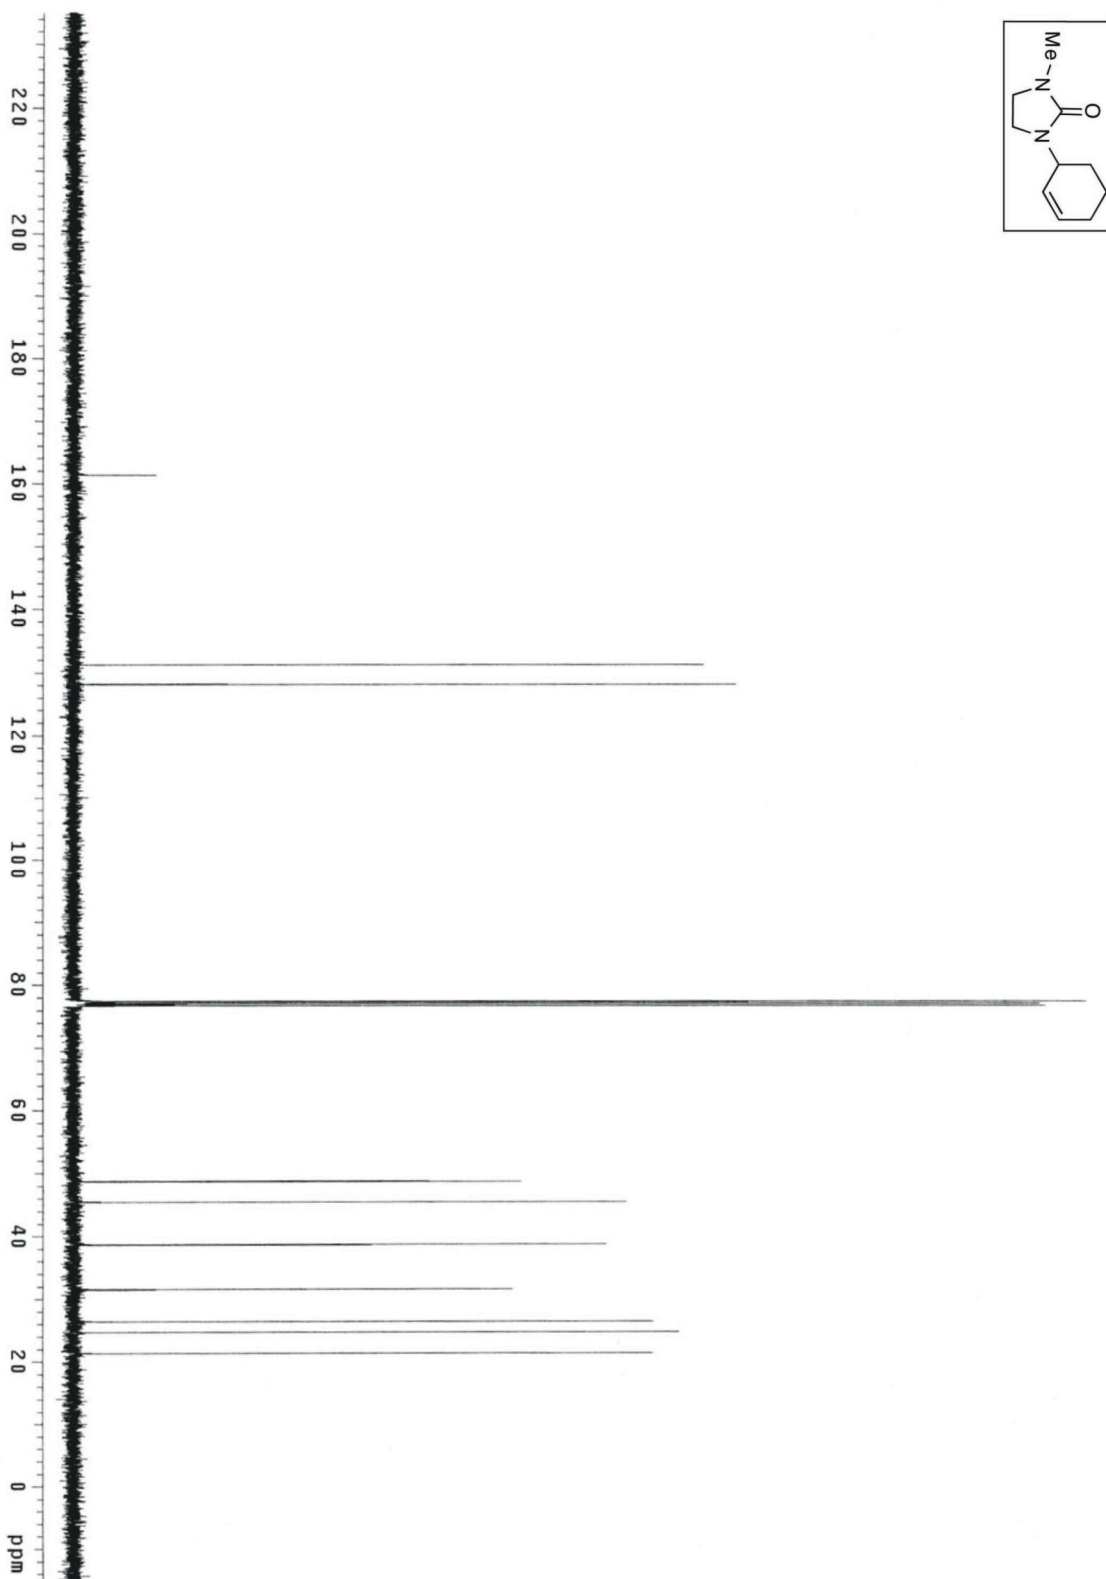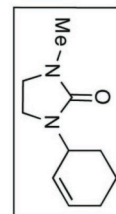

Figure S35. <sup>1</sup>H NMR spectrum of 1-methyl-3-(pent-3-en-2-yl)imidazolidin-2-one (11).

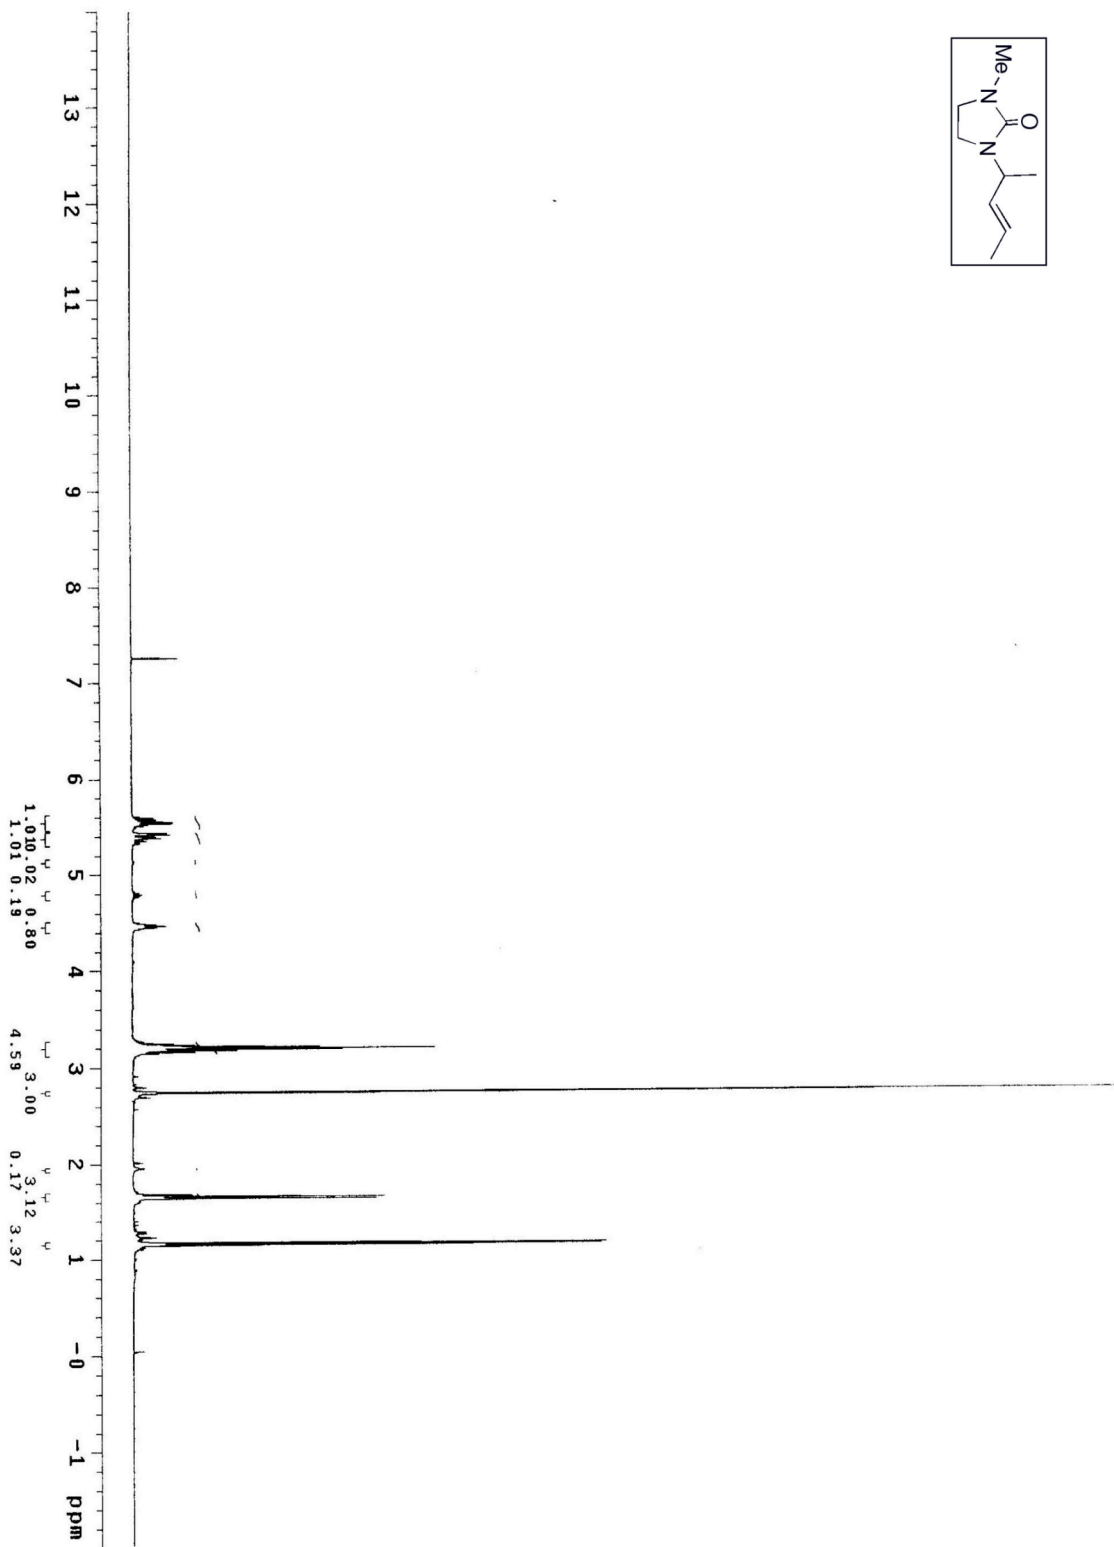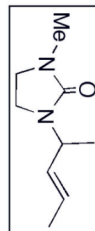

Figure S36.  $^{13}\text{C}\{^1\text{H}\}$  NMR spectrum of 1-methyl-3-(pent-3-en-2-yl)imidazolidin-2-one (11).

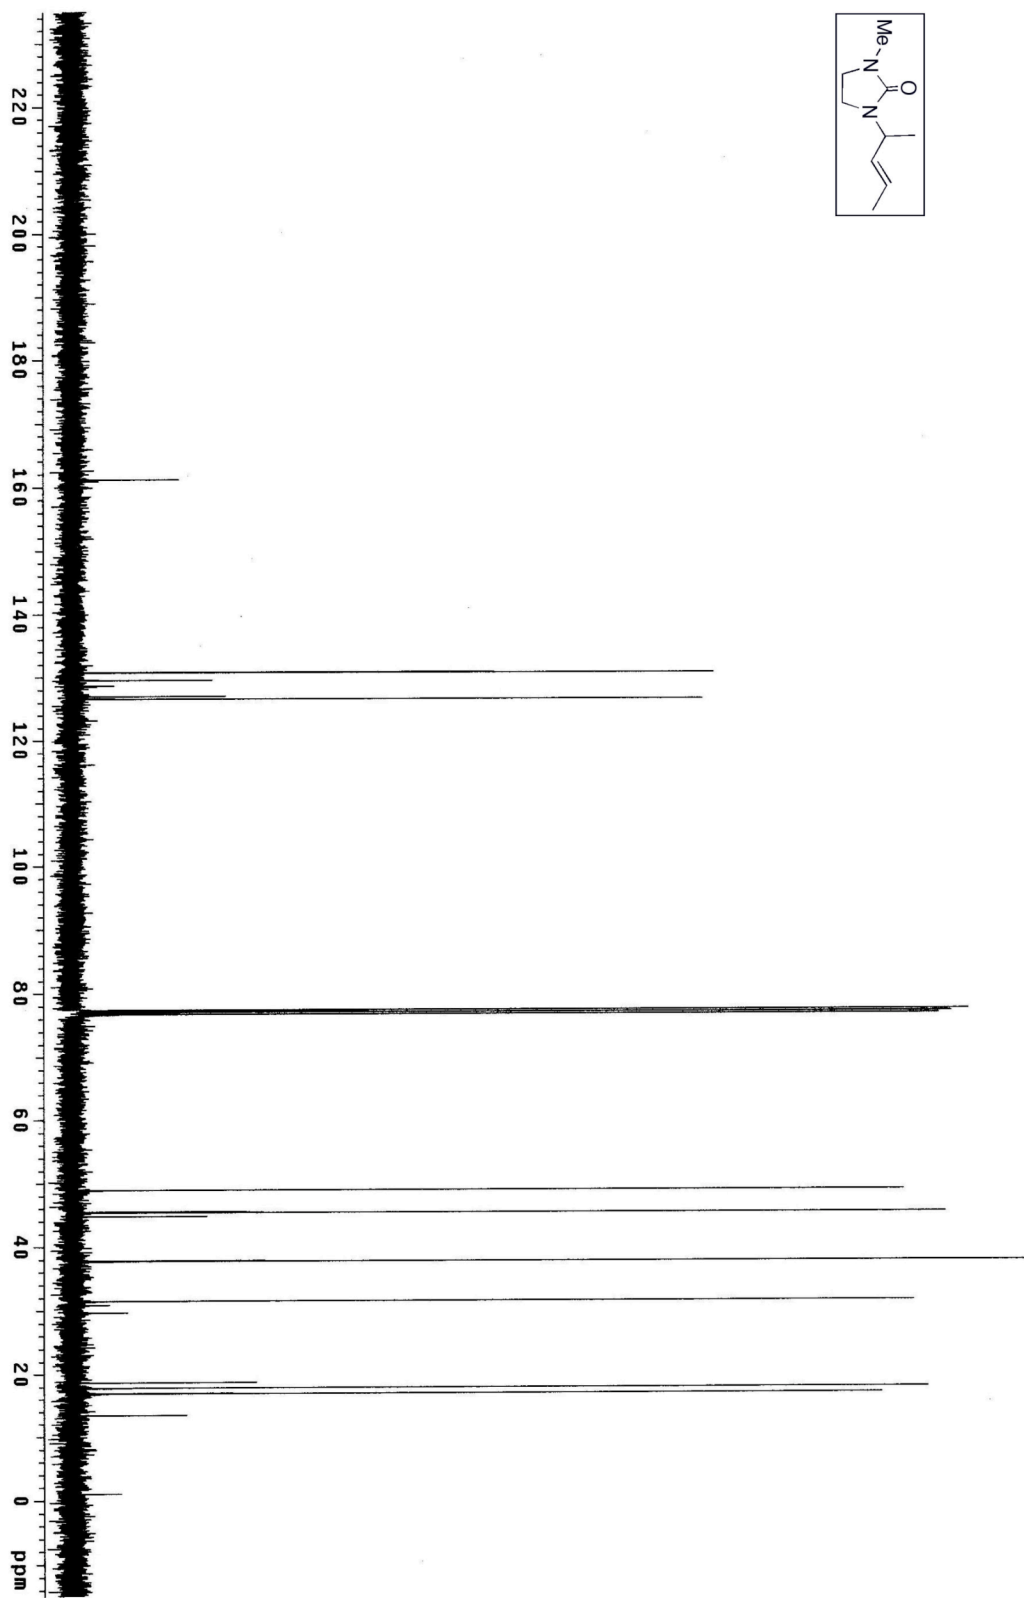



**Figure S37.**  $^1\text{H}$  NMR spectrum of 1-(1-methyl-3-deuterio-2-butenyl)-3-methylimidazolidin-2-one (**11- $\gamma$ - $d_1$** ).

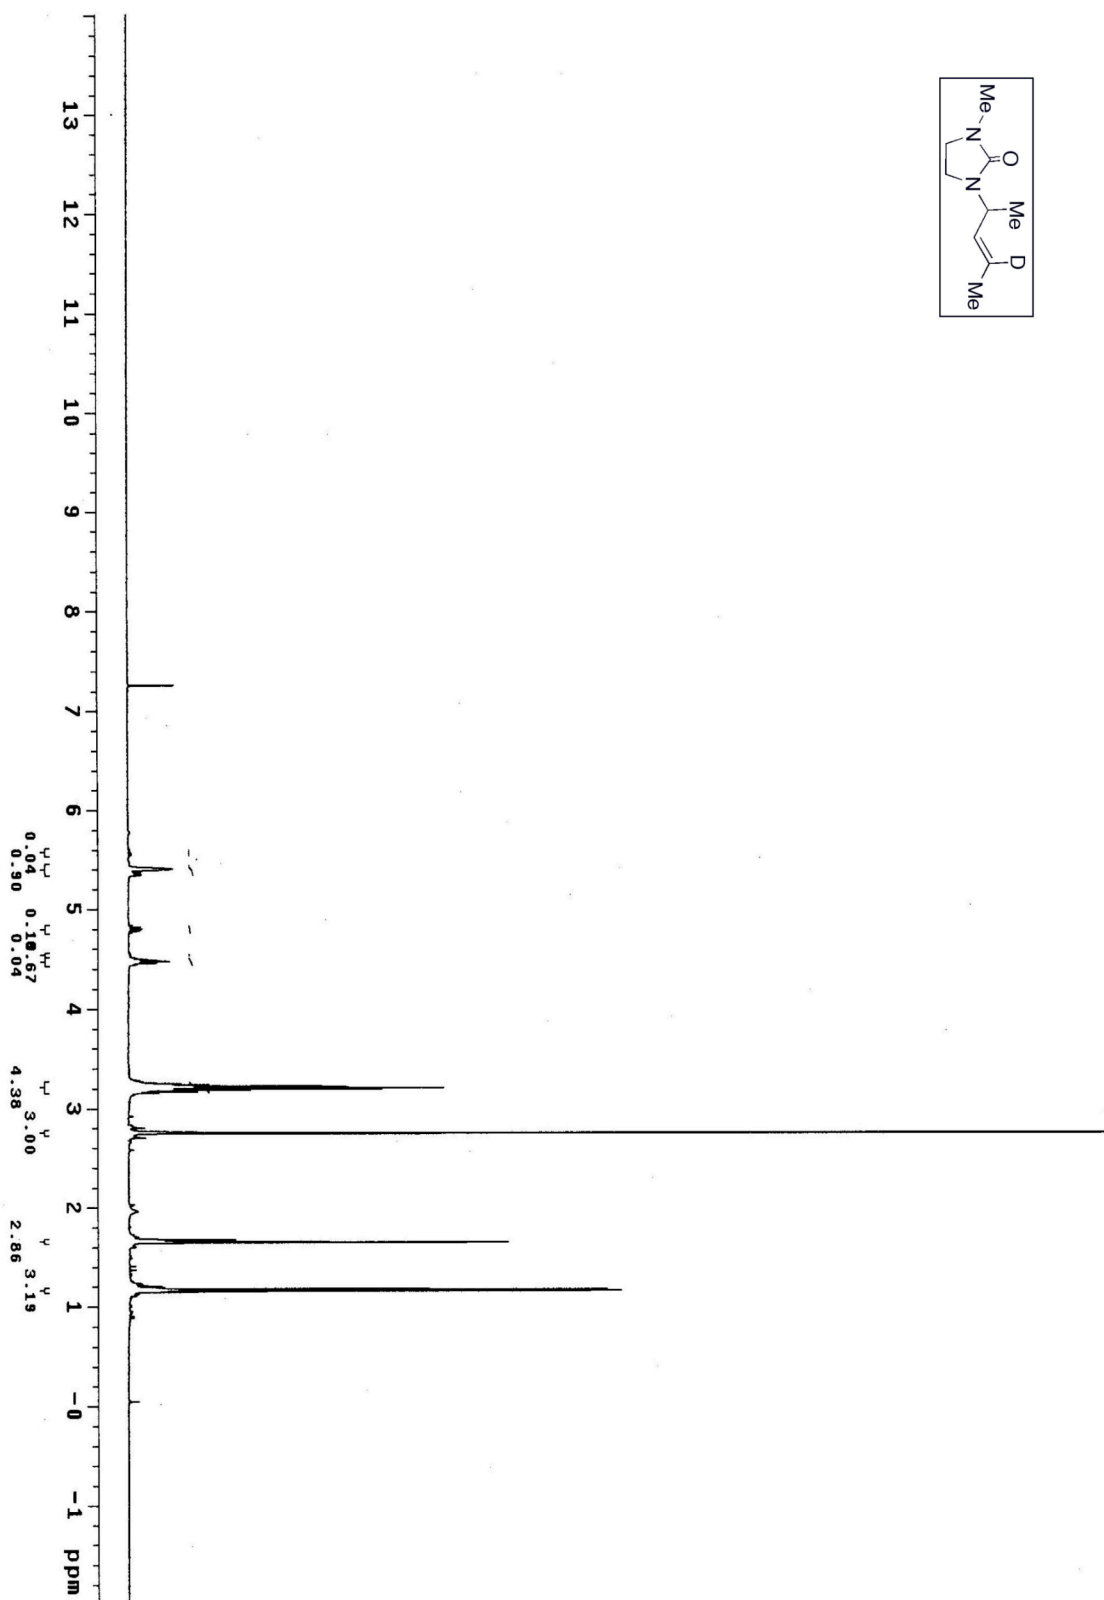

**Figure S38.**  $^{13}\text{C}\{^1\text{H}\}$  NMR spectrum of 1-(1-methyl-3-deuterio-2-butenyl)-3-methylimidazolidin-2-one (**11- $\gamma$ - $d_1$** ).

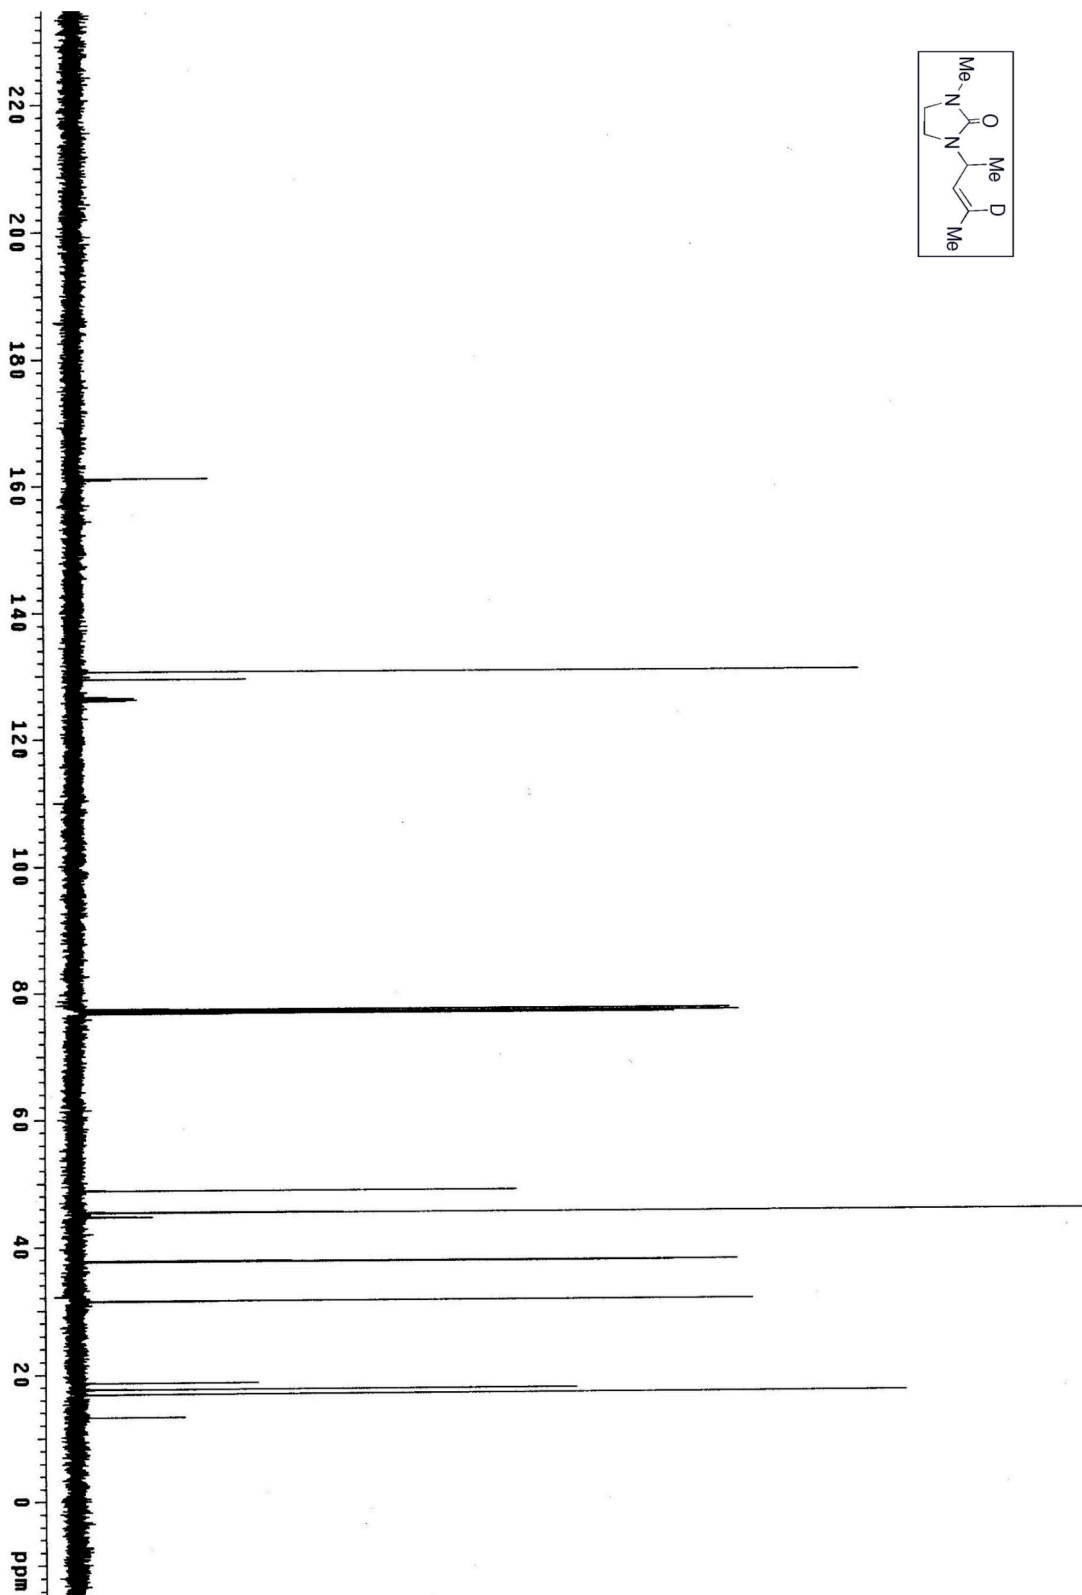

**Figure S39.**  $^1\text{H}$  NMR spectrum of (*E*)-1-(1,3-diphenylallyl)-3-methylimidazolidin-2-one (**12**).

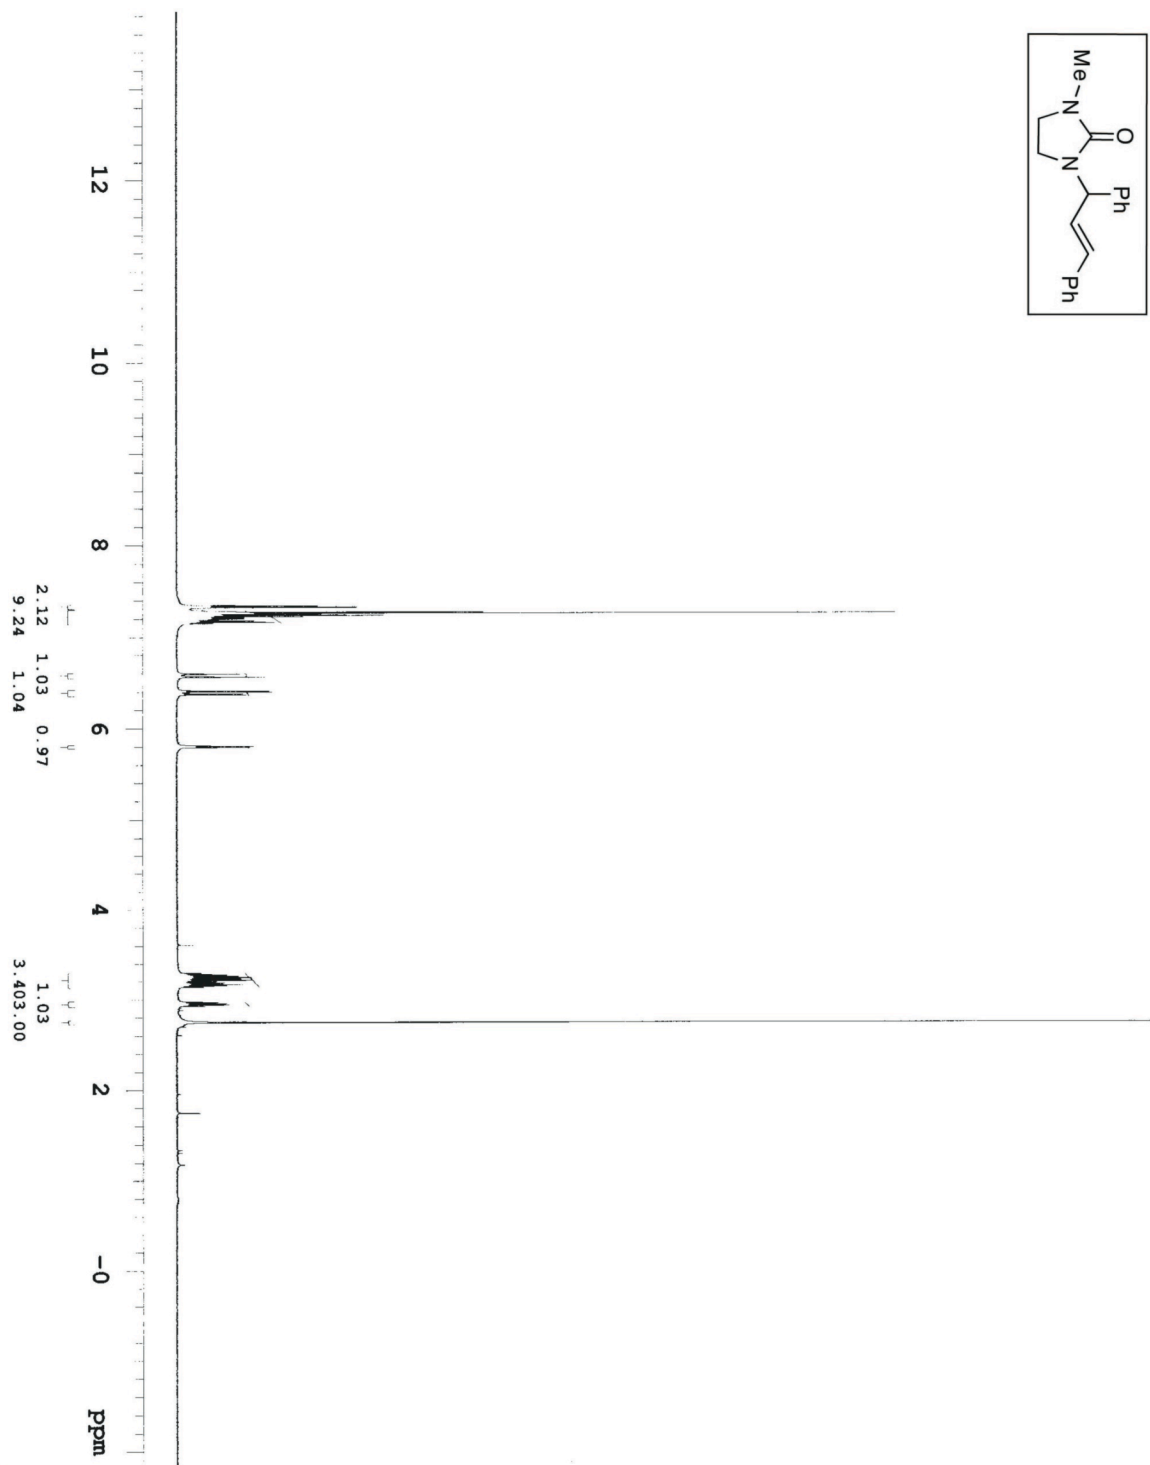

**Figure S40.**  $^{13}\text{C}\{^1\text{H}\}$  NMR spectrum of (*E*)-1-(1,3-diphenylallyl)-3-methylimidazolidin-2-one (**12**).

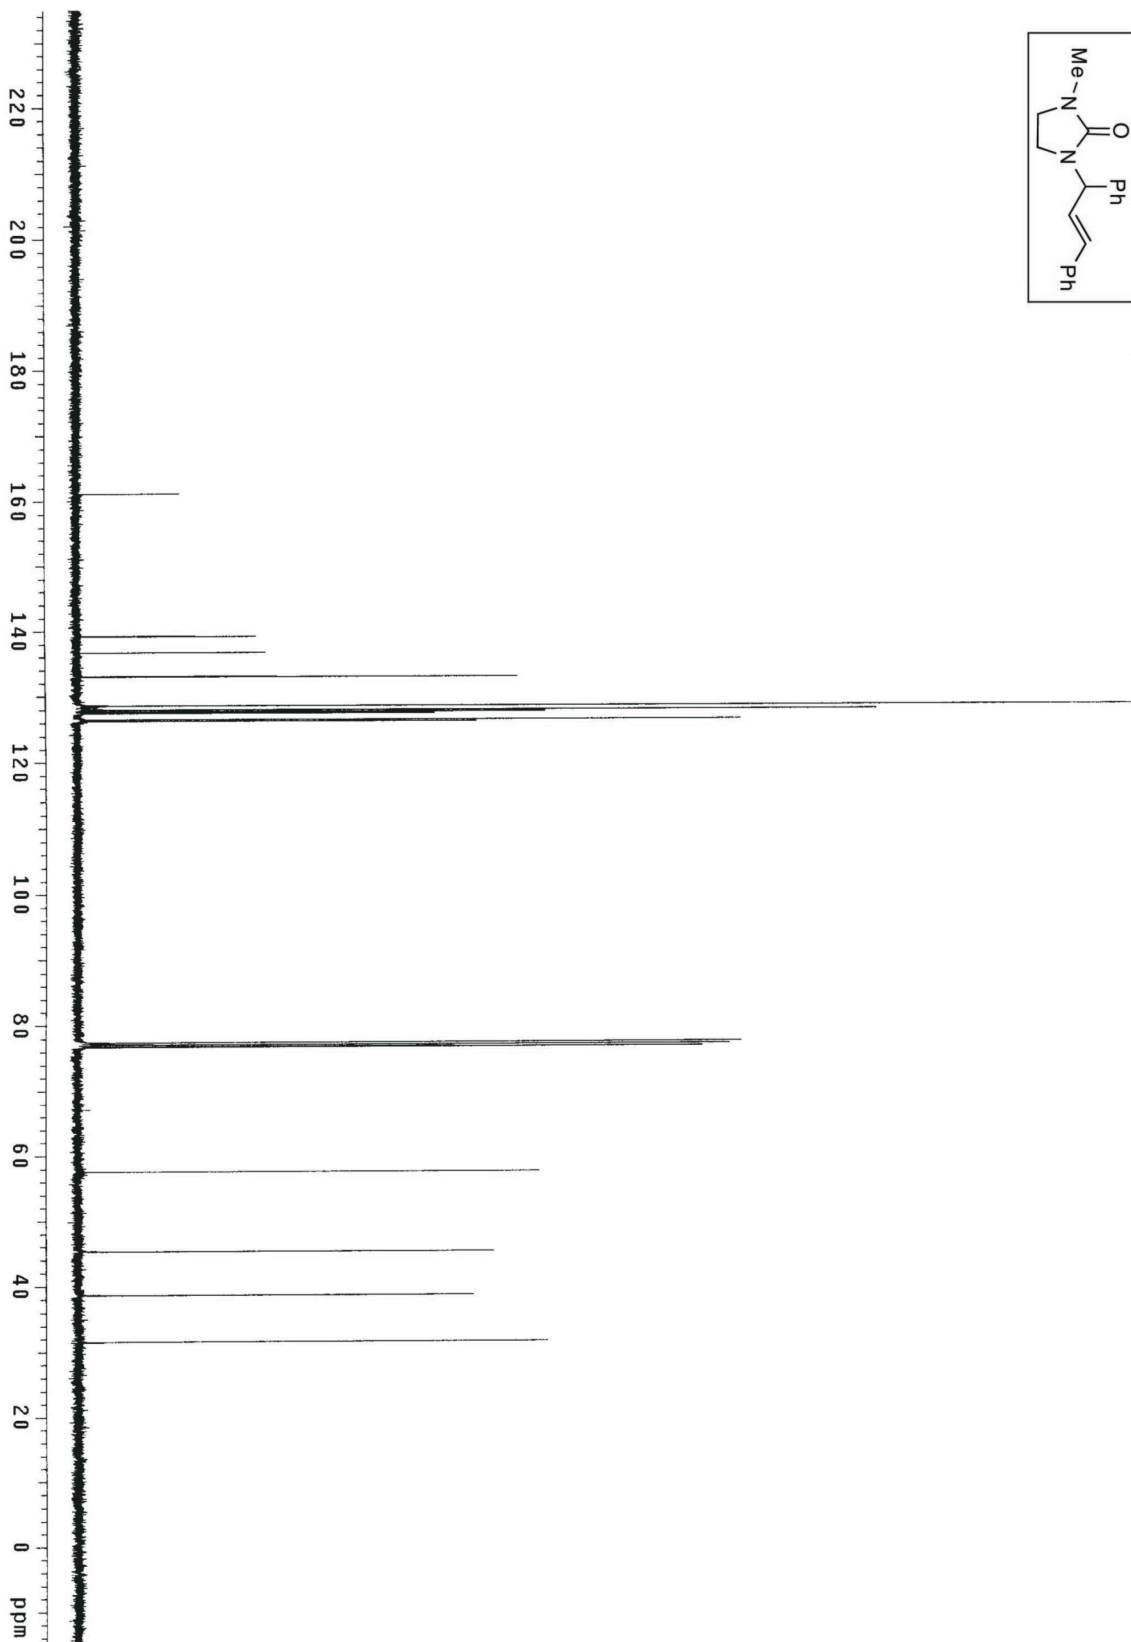

**Figure S41.**  $^1\text{H}$  NMR spectrum of 1-(hex-3-en-2-yl)-3-methylimidazolidin-2-one (**14**).

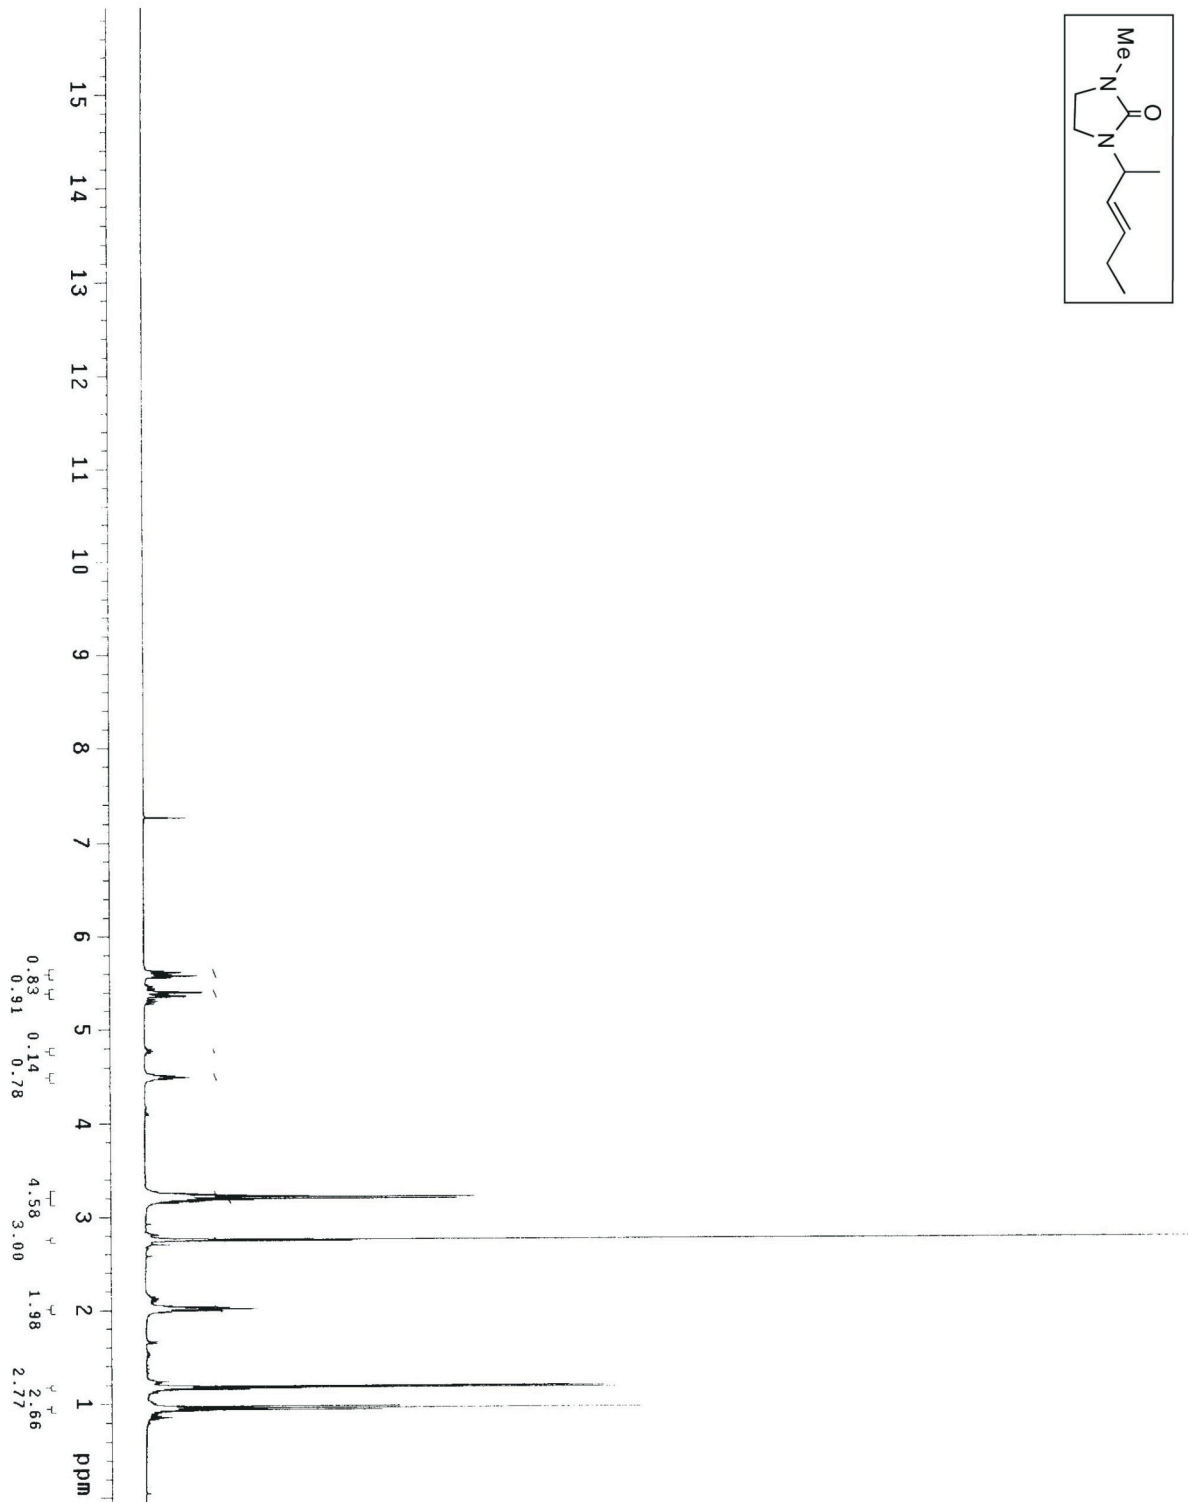

Figure S42.  $^{13}\text{C}\{^1\text{H}\}$  NMR spectrum of 1-(hex-3-en-2-yl)-3-methylimidazolidin-2-one (**14**).

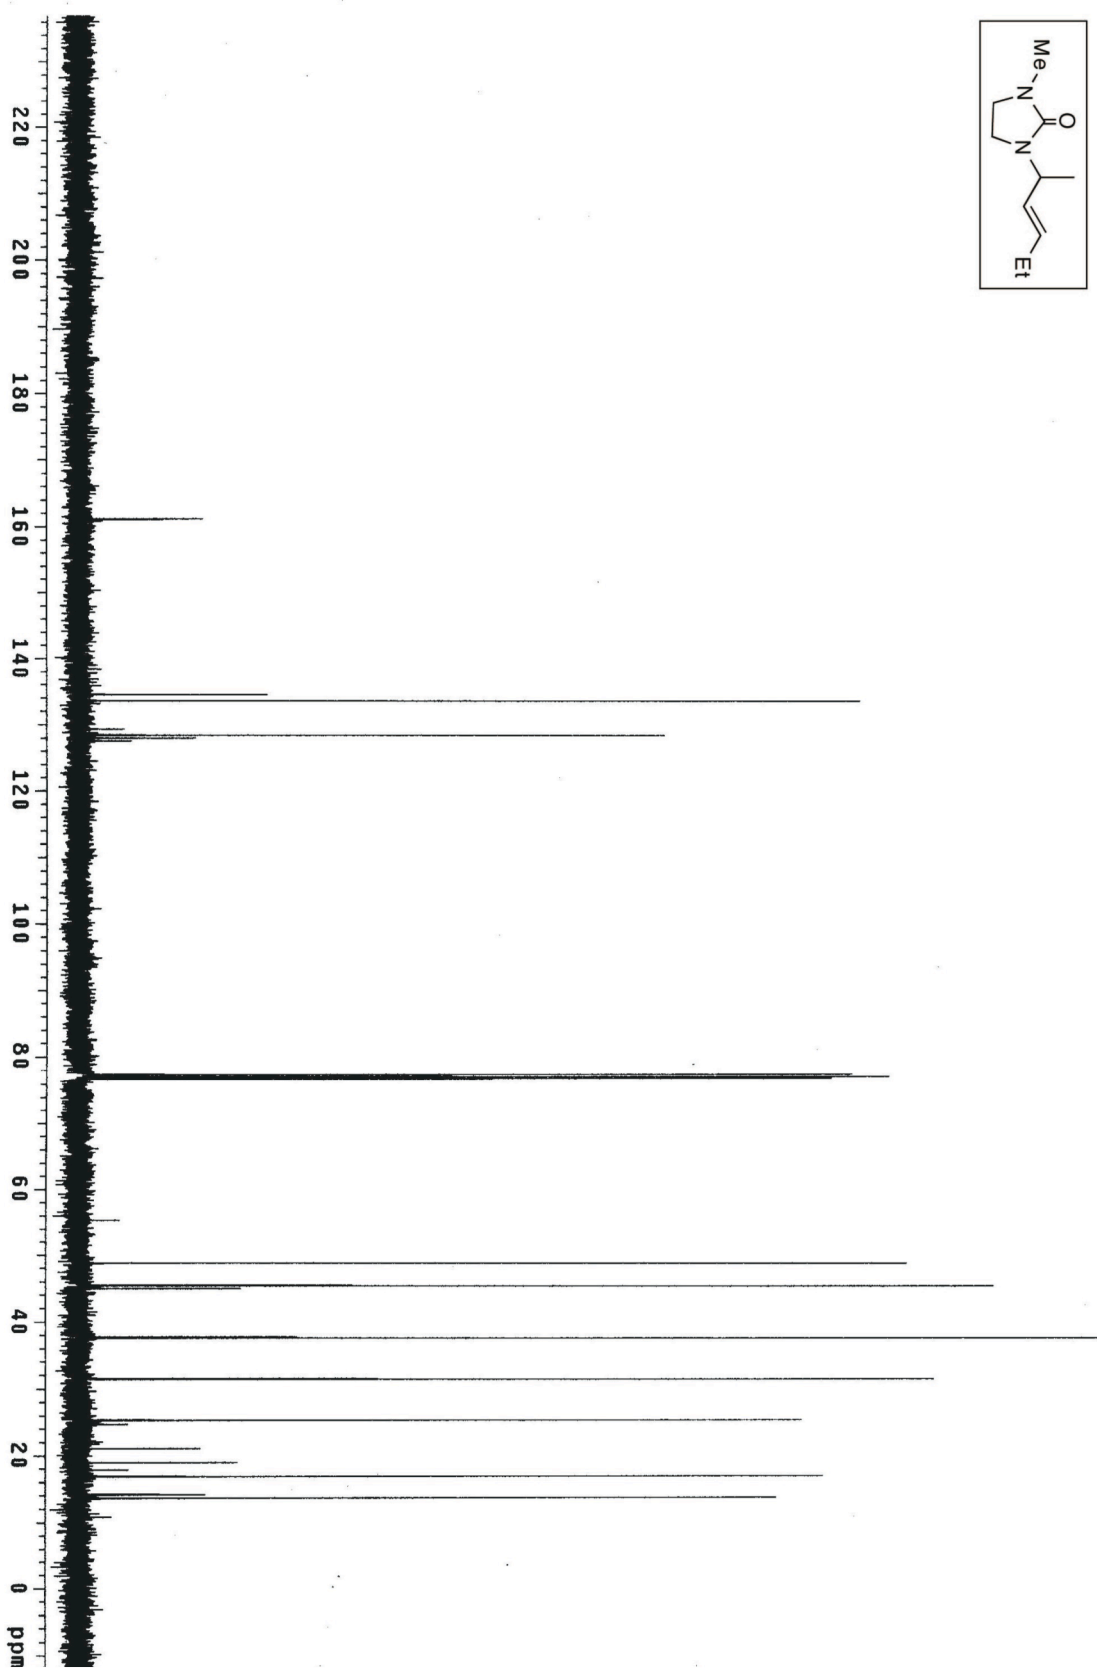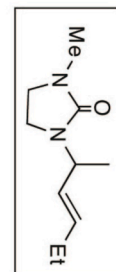

**Figure S43.**  $^1\text{H}$  NMR spectrum of 1-methyl-3-(pentan-2-yl)imidazolidin-2-one (**S3**).

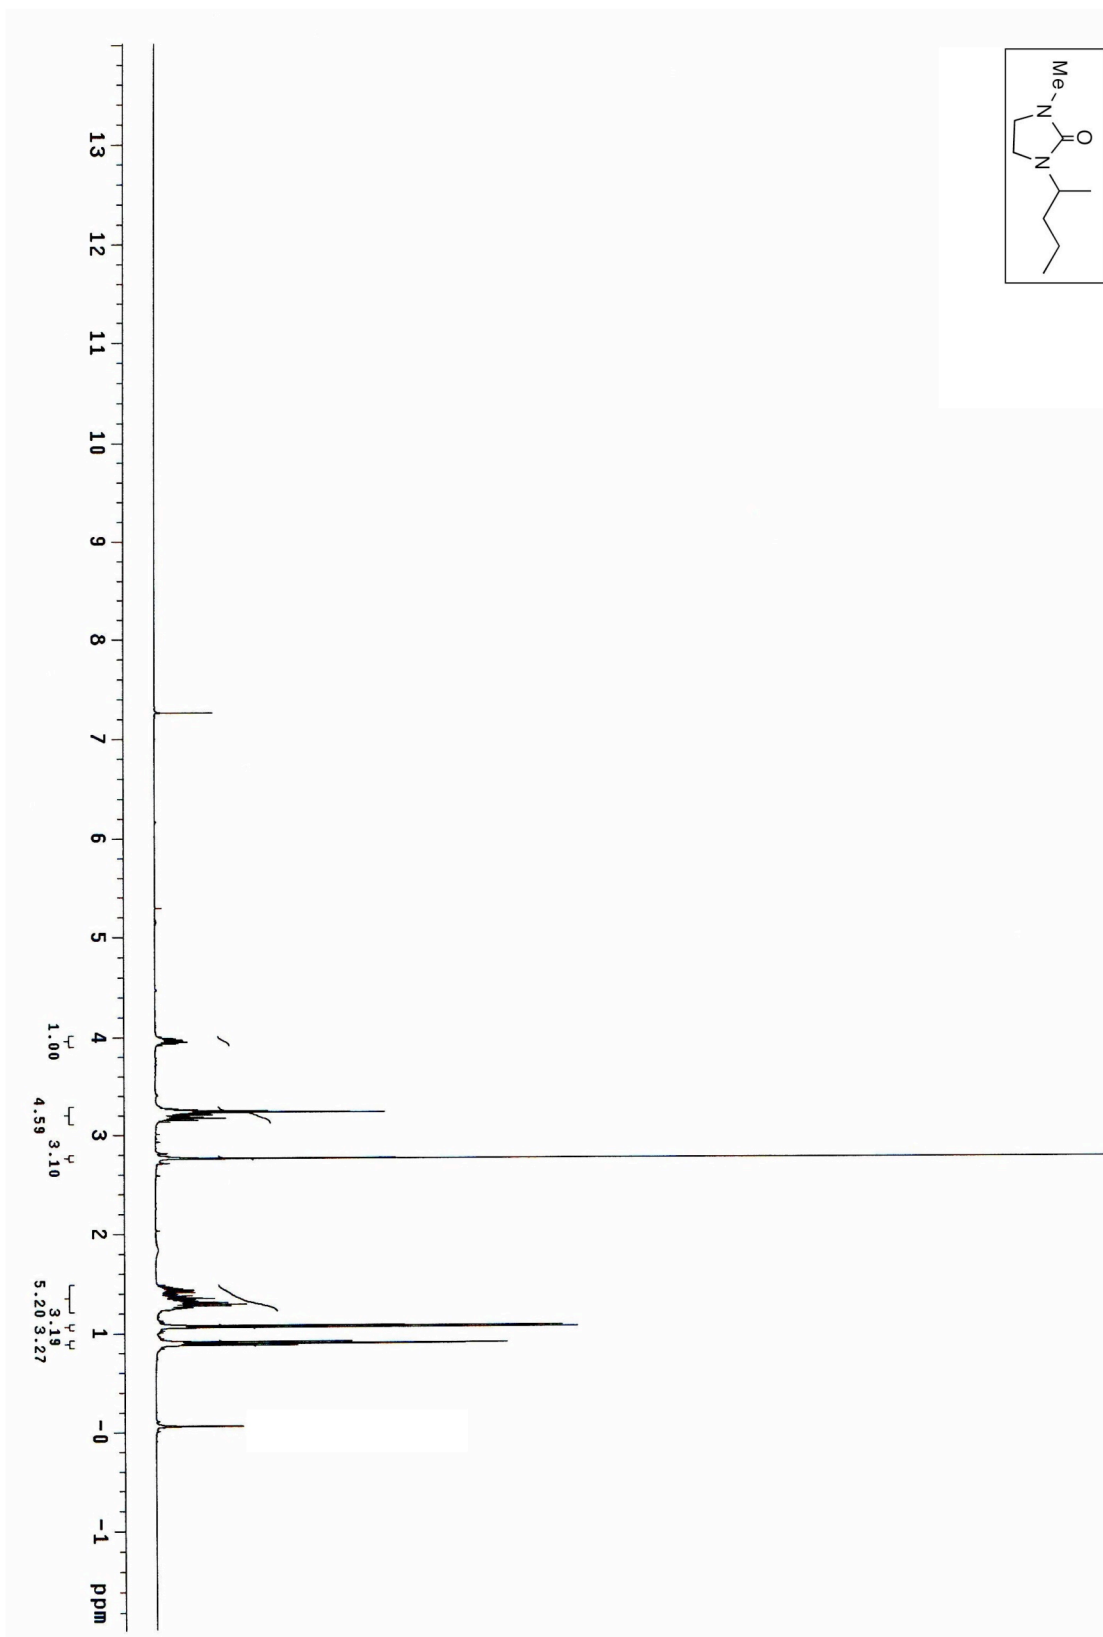

Figure S44.  $^{13}\text{C}\{^1\text{H}\}$  NMR spectrum of 1-methyl-3-(pentan-2-yl)imidazolidin-2-one (**S3**).

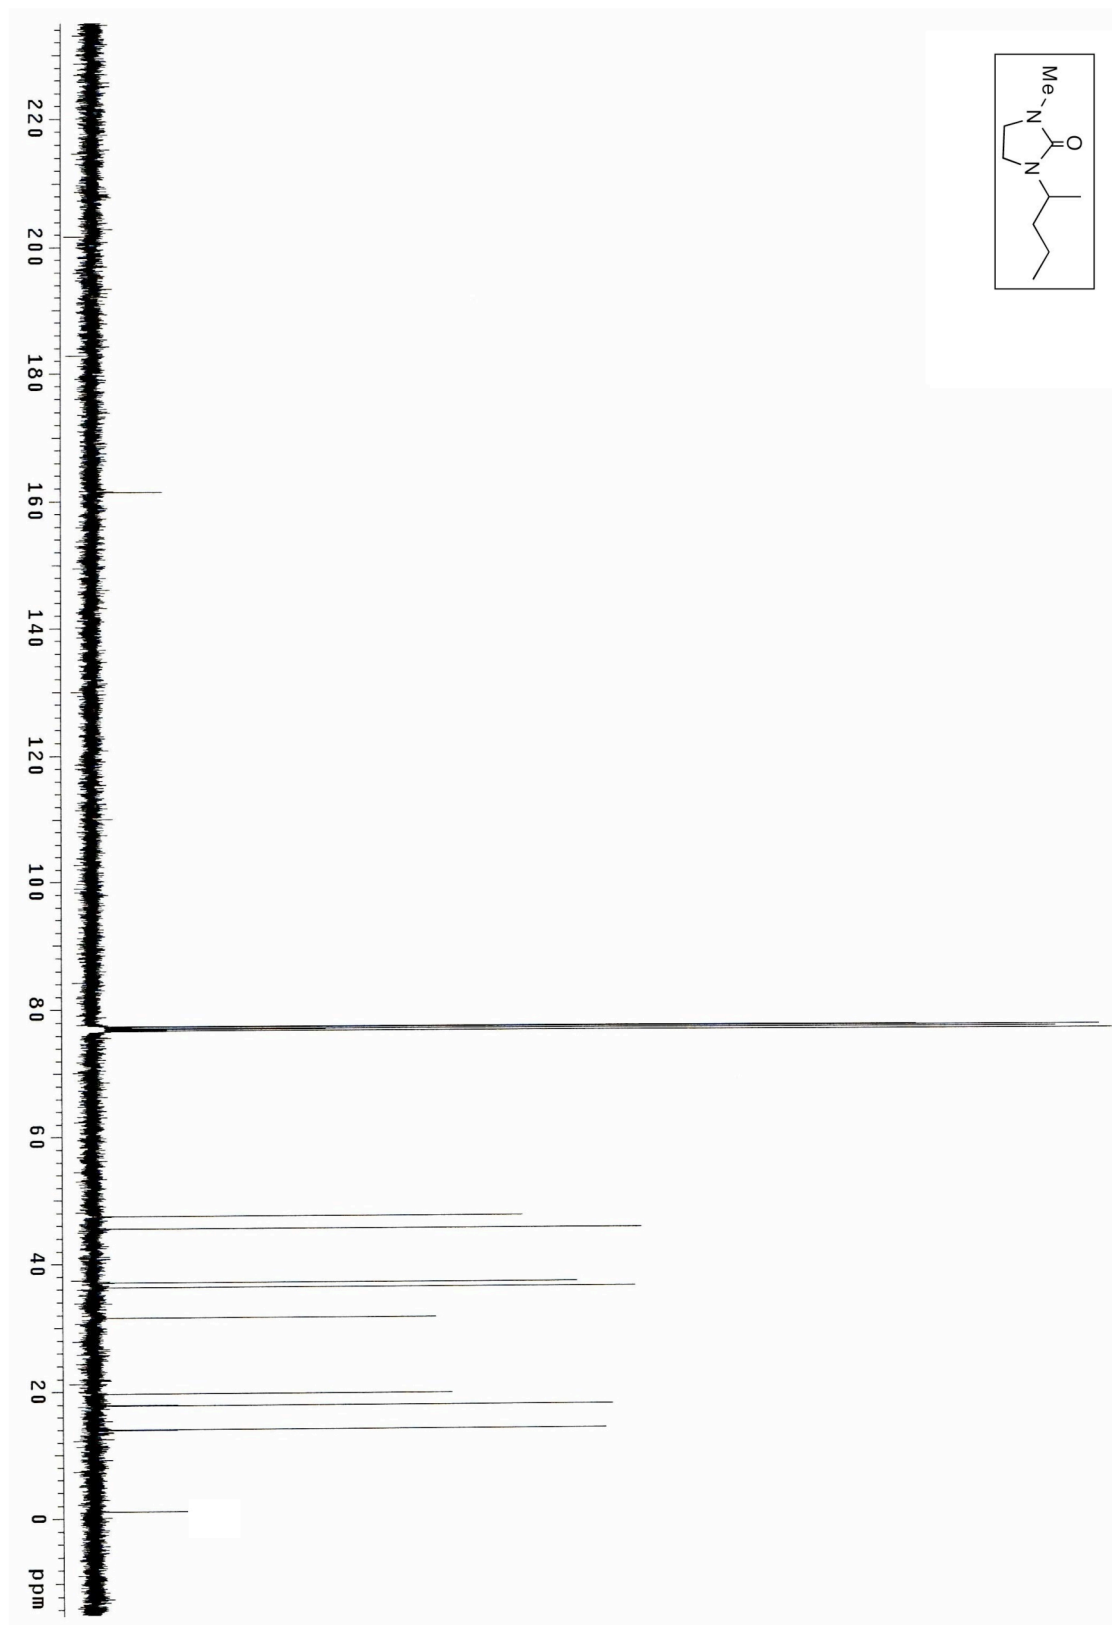

Supplement: NIHMS182257-supplement-2_si_002.pdf [file NIHMS182257-supplement-2_si_002.pdf]
